1 Nucleolin loss-of-function leads to aberrant FGF signaling and craniofacial anomalies

2

3 Soma Dash<sup>1</sup>, Paul A. Trainor<sup>1,2\*</sup>

4

5

6

7

8 <sup>1</sup> Stowers Institute for Medical Research, Kansas City, MO, USA

9

10 <sup>2</sup> Department of Anatomy and Cell Biology, University of Kansas Medical Center, Kansas City,  
11 KS, USA.

12

13

14 \* Corresponding author

15

16 E-mail: PAT@stowers.org

17

18

19 **Abstract**

20 rRNA transcription and ribosome biogenesis are global processes required for growth and  
21 proliferation of all cells, yet perturbation of these processes in vertebrates leads to tissue-specific  
22 defects termed ribosomopathies. Mutations in rRNA transcription and processing proteins often  
23 lead to craniofacial anomalies, however the cellular and molecular reasons for this are poorly  
24 understood. Therefore, we examined the function of the most abundant nucleolar phosphoprotein,  
25 Nucleolin (Ncl), in vertebrate development. We discovered that Nucleolin is dynamically  
26 expressed during embryonic development with high enrichment in the craniofacial tissues.  
27 Consistent with this pattern of expression, *ncl* homozygous mutant (*ncl*<sup>-/-</sup>) zebrafish present with  
28 craniofacial anomalies such as mandibulofacial hypoplasia. We observe that *ncl*<sup>-/-</sup> mutants exhibit  
29 decreased rRNA synthesis and p53-dependent neuroepithelial cell death. In addition, the half-life  
30 of *fgf8a* mRNA is reduced in *ncl*<sup>-/-</sup> mutants, which perturbs Fgf signaling, resulting in misregulation  
31 of Sox9a mediated chondrogenesis and Runx2 mediated osteogenesis. Exogenous addition of  
32 human recombinant FGF8 to the mutant zebrafish significantly rescues the cranioskeletal  
33 phenotype, suggesting that Nucleolin regulates osteochondroprogenitor differentiation during  
34 craniofacial development by post-transcriptionally regulating Fgf signaling. Our work has  
35 therefore uncovered a novel tissue-specific function for Nucleolin in rRNA transcription and growth  
36 factor signaling during embryonic craniofacial development.

## 37 **Introduction**

38 The craniofacial complex consists of the primary sense organs, central and peripheral nervous  
39 systems, and musculoskeletal components of the head and neck. Craniofacial development is an  
40 intricate process that involves coordinated interaction of all three germ layers and is sensitive to  
41 environmental and genetic insults resulting in craniofacial disorders. Despite advances in  
42 sequencing, many affected individuals have an unknown genetic diagnosis. Therefore, it is  
43 necessary to identify novel genetic factors and understand the cellular and molecular mechanisms  
44 that regulate normal craniofacial development, which may also aid in identifying potential  
45 therapeutic targets to prevent and/or ameliorate craniofacial diseases.

46 Ribosome biogenesis is essential for cell growth and survival because ribosome quantity  
47 and quality dictate the translation of mRNA into proteins. Transcription of ribosomal DNA (rDNA)  
48 by RNA Polymerase (Pol) I in the nucleolus generates a 47S pre-ribosomal RNA (pre-rRNA). The  
49 47S pre-rRNA is then cleaved and processed into 18S, 5.8S and 28S rRNAs. These rRNAs  
50 together with Pol III transcribed 5S rRNA associate with ribosomal proteins and accessory  
51 proteins to form ribosomes<sup>1</sup>. The transcription and processing of pre-rRNA requires RNA Pol I  
52 together with associated proteins such as UBTF and SL-1<sup>2,3</sup> as well as rRNA processing proteins  
53 including Tcof1<sup>4</sup>, Nol11<sup>5</sup>, Wrd43<sup>6</sup> and Fibrillarin<sup>7</sup>. Interestingly, when Pol I subunits or any of the  
54 associated factors are disrupted or mutated in zebrafish, xenopus or mice, it results in  
55 developmental defects that mostly affect craniofacial cartilage and bone differentiation<sup>6,8-12</sup>. This  
56 raises the question of why disruptions in these ubiquitously expressed genes, which are required  
57 in a global process, result in tissue specific craniofacial anomalies. One hypothesis is that neural  
58 crest cells (NCC), which are the progenitors of most of the craniofacial bone and cartilage, are  
59 more proliferative or metabolically active than non-neural crest cells. In addition, NCCs undergo  
60 major cytoskeletal changes during their epithelial-to-mesenchymal transition, which requires high  
61 levels of new protein synthesis and hence, more rRNA transcription. Another hypothesis is that  
62 RNA Pol I subunit, associated proteins and rRNA processing proteins have other non-ribosome

63 functions, which together with the regulation of rRNA synthesis make the craniofacial skeleton  
64 more susceptible to disruption.

65 Nucleolin is a major nucleolar protein and rRNA processing protein as well as an mRNA  
66 and DNA binding protein<sup>13,14</sup>. Among the top ten highly enriched genes in neural crest cells, *Ncl*  
67 is the only one involved in rRNA transcription<sup>15</sup>. Therefore, in this study we explore the hypothesis  
68 that Nucleolin regulates rRNA transcription as well as craniofacial specific gene expression and  
69 function during embryogenesis. We show that Nucleolin is essential for embryo survival and is  
70 required for craniofacial bone and cartilage development. Nucleolin regulates rRNA  
71 transcriptionally, *fgf8a* mRNA post-transcriptionally and p53 protein post-translationally.  
72 Consistent with this model, we demonstrate that exogenous human recombinant FGF8 can  
73 ameliorate the cranioskeletal defects as well as recover rRNA transcription in *ncl*<sup>-/-</sup> mutant  
74 embryos. Our work, therefore, has uncovered novel tissue-specific functions for Nucleolin in  
75 craniofacial development through regulating rRNA transcription and FGF signaling during  
76 embryogenesis.

77

## 78 **Results**

### 79 **Nucleolin is dynamically expressed during craniofacial development**

80 To understand the function of Nucleolin in vertebrate development, we characterized its  
81 expression during zebrafish embryogenesis (Fig. 1). Nucleolin is maternally expressed at 1.5 hour  
82 post fertilization (hpf) and remains ubiquitously expressed through gastrulation (3 hpf), early  
83 neurulation (12 hpf) and axial segmentation (18 hpf) (Fig. 1A-D). At 24 hpf, the expression of  
84 Nucleolin is still ubiquitous, however it is enriched in the eye and midbrain-hindbrain boundary  
85 (MHB) (Fig. 1E). In 36 and 72 hpf zebrafish embryos, elevated expression of Nucleolin is observed  
86 within the eye, pharyngeal arches and brain (Fig. 1F,G). These expression analyses demonstrate  
87 that Nucleolin is dynamically expressed during embryogenesis with enriched expression in

88 craniofacial tissues. Further, this suggests that Nucleolin may be required for proper craniofacial  
89 morphogenesis.

90

## 91 **Mutations in zebrafish *ncl* result in craniofacial anomalies**

92 To test our hypothesis that Nucleolin functions during craniofacial development, we  
93 characterized the phenotype of the *ncl* mutant zebrafish line, *ncl*<sup>hi2078Tg</sup>. *ncl*<sup>hi2078Tg</sup> was generated  
94 by insertional mutagenesis of exon 1, which disrupts *ncl* transcription<sup>16</sup>, dramatically reducing the  
95 levels of Nucleolin protein between 18 hpf and 24 hpf (Fig 1C'-G'), thereby establishing *ncl*<sup>hi2078Tg</sup>  
96 zebrafish as *ncl*<sup>-/-</sup> mutants.

97 *ncl*<sup>-/-</sup> embryos are phenotypically distinguishable from their WT siblings at 24 hpf by the  
98 presence of necrosis in the craniofacial region (Fig. 2A-B). At 36hpf, *ncl*<sup>-/-</sup> embryos have a beak-  
99 like frontonasal prominence and misshapen midbrain-hindbrain boundary (MHB) (Fig. 2C-D'). By  
100 3 days post fertilization (dpf), *ncl*<sup>-/-</sup> mutants display craniofacial anomalies such as mandibular  
101 hypoplasia in addition to a misshapen MHB (Fig. 2E-F'). 5dpf *ncl*<sup>-/-</sup> embryos continue to exhibit  
102 craniofacial anomalies and fail to inflate their swim bladders (Fig. S1A-A'), which collectively leads  
103 to their lethality between 6-10 dpf (Fig. S1 D-D').

104 To further characterize the craniofacial defects in *ncl*<sup>-/-</sup> embryos, we performed skeletal  
105 staining with Alcian blue and Alizarin red for cartilage and bone, respectively. At 3 dpf, *ncl*<sup>-/-</sup>  
106 embryos display hypoplastic Meckel's and ceratohyal cartilages compared to their *ncl*<sup>+/+</sup> siblings.  
107 (Fig. S1B-B'). In 5 dpf *ncl*<sup>-/-</sup> embryos, the craniofacial cartilages are severely hypoplastic (Fig. 2G-  
108 M). In the neurocranium, the trabecula and parasphenoid, which forms the base of the skull<sup>17</sup>, are  
109 smaller in *ncl*<sup>-/-</sup> mutants compared to *ncl*<sup>+/+</sup> siblings (Fig. 2I-J). In *ncl*<sup>+/+</sup> larvae, both edge and medial  
110 chondrocyte populations are present and are demarcated by differential Alcian blue staining.  
111 However, in *ncl*<sup>-/-</sup> larvae, cells in the ethmoid plate exhibit uniform Alcian blue staining, suggesting  
112 that differentiation of medial chondrocytes in the ethmoid plate may be perturbed. In addition, the  
113 trabecula and parasphenoid are smaller in *ncl*<sup>-/-</sup> larvae compared to *ncl*<sup>+/+</sup> larvae (Fig. 2K). In the

114 viscerocranium, Meckel's cartilage is misshapen and the ceratohyal exhibits reverse polarity while  
115 the basihyal is missing in *ncl*<sup>-/-</sup> larvae. Furthermore, the posterior pharyngeal arch derived  
116 ceratobranchials are hypoplastic (Fig. 2L-M) and osteogenesis of the teeth is incomplete in *ncl*<sup>-/-</sup>  
117 larvae. At 8 dpf and 10 dpf, the polarity of the ceratohyal is similar between *ncl*<sup>+/+</sup> and *ncl*<sup>-/-</sup> larvae,  
118 suggesting that *ncl*<sup>-/-</sup> larvae may have delayed cranioskeletal development. However, Meckel's  
119 cartilage remains misshapened and the ceratobranchials remain hypoplastic in 8 dpf *ncl*<sup>-/-</sup> mutant  
120 zebrafish (Fig. S1 B-C' and E-F'). This establishes Nucleolin as being essential for proper  
121 cranioskeletal development, and *ncl*<sup>-/-</sup> mutant zebrafish as a new model for understanding the  
122 etiology and pathogenesis of craniofacial anomalies.

123

#### 124 ***ncl*<sup>-/-</sup> zebrafish have diminished rRNA synthesis**

125         Molecularly, Nucleolin binds to and modifies histones on the promoter of rDNA, and  
126 thereby regulates rRNA transcription, which is a rate-limiting step of ribosome biogenesis<sup>18</sup>. In  
127 addition, Nucleolin is a component of the U3 snoRNA, and thus binds to pre-rRNA to process and  
128 splice it<sup>13,19,20</sup>. Therefore, we hypothesized that *ncl* loss-of-function would lead to diminished rRNA  
129 transcription and processing.

130         To validate our hypothesis, we quantified rRNA transcription by assaying for the intergenic  
131 regions of the 47S pre-rRNA - 5'ETS, ITS1 and ITS2 as well as 18S rRNA by qRT-PCR. We  
132 observed a significant reduction of all four amplicons in *ncl*<sup>-/-</sup> embryos compared to *ncl*<sup>+/+</sup> siblings,  
133 suggesting that Nucleolin is necessary for rRNA transcription in zebrafish (Fig.3A). We then  
134 performed RNA immunoprecipitation using a Nucleolin specific antibody and observed that  
135 Nucleolin binds to the 5'ETS and ITS1 but not to ITS2 and 18S regions of the 47S pre-RNA (Fig.  
136 3B), consistent with the known function of Nucleolin *in vitro*<sup>18</sup>.

137         Decreased rRNA transcription has previously been shown *in vitro* to result in increased  
138 free ribosomal proteins in cells, which then interact with Mdm2, changing its conformation such  
139 that Mdm2 can no longer bind to p53 and ubiquitinate it for degradation. Consequently, p53

140 accumulates in the cell and results in p53 dependent cell death<sup>21</sup>. To test if this mechanism holds  
141 true in *ncf*<sup>-/-</sup> embryos, we first performed qPCR and western blot to assess for p53 expression.  
142 We observed that the *p53* transcript level is not significantly changed in *ncf*<sup>-/-</sup> embryos compared  
143 to *ncf*<sup>+/+</sup> siblings between 18 hpf and 36 hpf (Fig. 3C). In contrast, p53 protein levels are  
144 significantly upregulated at 24 hpf, however the difference between *ncf*<sup>+/+</sup> and *ncf*<sup>-/-</sup> mutants  
145 subsides by 36 hpf (Fig. 3E, I). The downstream target of p53, *p21* is initially upregulated between  
146 24-30 hpf, but then is considerably downregulated by 36 hpf (Fig. 3C). Nucleolin regulates p53  
147 expression by various mechanisms including increasing p53 mRNA and/or protein stability<sup>22,23</sup>.  
148 We observe that in wildtype zebrafish tissues, Nucleolin does not bind to zebrafish *p53* mRNA  
149 (Fig. 3D). Instead, Nucleolin binds to p53 protein (Fig. 3F). Prior to examining the binding  
150 efficiency of Mdm2 and p53 in control and *ncf*<sup>-/-</sup> embryos, we confirmed that Nucleolin is indeed  
151 absent in *ncf*<sup>-/-</sup> embryos at 28hpf (Fig. 3G). We then performed immunoprecipitation for Mdm2 in  
152 control and *ncf*<sup>-/-</sup> embryos and immunoblotted for both Mdm2 and p53. We observe decreased  
153 pulldown of Mdm2 and p53 in *ncf*<sup>-/-</sup> embryos compared to control embryos indicating that the initial  
154 accumulation of p53 is a result of reduced interactions between Mdm2 and p53 (Fig. 3H-J). The  
155 downregulation of p53 at later stages might be due to a lack of Nucleolin stabilizing p53 protein  
156 to increase its half-life.

157

### 158 **p53-dependent cell death is increased in *ncf* mutant embryos**

159 To examine if increased p53 activation and accumulation results in cell death and  
160 therefore necrotic craniofacial tissue in the mutants (Fig. 2A), we performed TUNEL staining at  
161 24 hpf and observed a general increase in apoptosis in *ncf*<sup>-/-</sup> embryos compared to *ncf*<sup>+/+</sup> controls  
162 (Fig. 3K-K'). However, by 36 hpf, TUNEL positive cells were restricted to the MHB in *ncf*<sup>-/-</sup> embryos  
163 (Fig. 3L-L'), consistent with a reduction in p53 protein levels.

164 p53 activation can lead to increased apoptosis as well as decreased proliferation that  
165 collectively result in tissue hypoplasia. Therefore, we performed immunostaining with the G2/M

166 phase marker phospho-histone H3 (pHH3) and observed no significant change in pHH3+ cells in  
167 24 hpf *ncl*<sup>-/-</sup> mutants compared to controls (Fig S2 A-B). Consistent with the decrease in p53 and  
168 p21 expression at 36 hpf, the number of pHH3 positive cells is significantly increased in *ncl*<sup>-/-</sup>  
169 embryos especially at the MHB at 48 hpf (Fig. S2 C,D,G). We also performed EdU staining on  
170 *ncl*<sup>+/+</sup> and *ncl*<sup>-/-</sup> zebrafish at 48 hpf to label cells in S-phase of the cell cycle and observed that the  
171 mutants have a higher number of EdU positive cells (Fig. S2 E,F,H). The increase in proliferation  
172 may explain how *ncl*<sup>-/-</sup> embryos survive beyond 24 hpf, even though they exhibit higher apoptosis.

173 We hypothesized that the increased apoptosis in *ncl*<sup>-/-</sup> embryos is p53 dependent and that  
174 genetically inhibiting p53 levels would suppress cell death and rescue the craniofacial anomalies  
175 in *ncl*<sup>-/-</sup> embryos. Therefore, we crossed the *tp53*<sup>M214K/M214K</sup> allele (hereafter referred to as *p53*<sup>-/-</sup>)  
176 into the background of *ncl*<sup>-/-</sup> mutant zebrafish to generate *ncl*<sup>-/-</sup>;*p53*<sup>-/-</sup> double mutants. Consistent  
177 with our hypothesis, TUNEL staining revealed a reduction in apoptotic cells in 24 hpf *ncl*<sup>-/-</sup>;*p53*<sup>-/-</sup>  
178 embryos compared to *ncl*<sup>-/-</sup> embryos (Fig 3L-L'). However, EdU labeling indicates that *ncl*<sup>-/-</sup>;*p53*<sup>-/-</sup>  
179 embryos have increased proliferation at 48 hpf similar to *ncl*<sup>-/-</sup> (Fig. S2 I-J), suggesting that the  
180 proliferation defects are not p53 dependent.

181 Removal of both the copies of *p53* and knocking down p53 using morpholinos altered jaw  
182 morphology in *ncl*<sup>-/-</sup> embryos (Fig. S3). Although the ceratohyal remained smaller compared to  
183 control siblings, its polarity was restored to normal. The basihyal, which was absent in *ncl*<sup>-/-</sup> mutant  
184 embryos is formed in *ncl*<sup>-/-</sup>;*p53*<sup>-/-</sup> embryos. However, chondrogenesis of the ceratobranchials was  
185 not improved. In addition, chondrogenesis in the neurocranium was disrupted. *ncl*<sup>-/-</sup>;*p53*<sup>-/-</sup> mutant  
186 zebrafish died around 10-12 dpf due to these cranioskeletal defects and a failure to inflate their  
187 swim bladders which is similar to *ncl*<sup>-/-</sup> mutant zebrafish. This suggests that while p53  
188 accumulation results in apoptosis during early development, the skeletal defects in *ncl*<sup>-/-</sup> mutant  
189 zebrafish are not p53 dependent.

190

191



## 192 **NCC development is unaffected in *ncl*<sup>-/-</sup> mutant embryos**

193 In vertebrates, NCC differentiate into most of the bones and cartilages of the craniofacial  
194 skeleton. To determine if defects in NCC induction and migration underlie the cranioskeletal  
195 malformations in *ncl*<sup>-/-</sup> mutants, we labeled NCC by crossing *sox10:egfp* transgenic zebrafish into  
196 *ncl*<sup>-/-</sup> mutant zebrafish. In addition, we immunostained *ncl*<sup>+/+</sup> and *ncl*<sup>-/-</sup> embryos with Zn-8, which  
197 labels the endodermal pouches to demarcate individual pharyngeal arches<sup>24,25</sup>. *sox10:egfp*  
198 labeling of pre- and post-migratory NCC and volumetric rendering of the pharyngeal arches  
199 revealed no significant change in the size of the pharyngeal arches in *ncl*<sup>-/-</sup> mutant embryos  
200 compared to *ncl*<sup>+/+</sup> embryos (Fig. S4 A-B). Comparison of *sox10:egfp* fluorescence intensity in the  
201 pharyngeal arches of *ncl*<sup>+/+</sup> and *ncl*<sup>-/-</sup> embryos suggests that NCC induction and migration to the  
202 arches are unaffected in the *ncl*<sup>-/-</sup> mutant embryos (Fig. S4 C). However, the pineal gland as well  
203 as the nasopharyngeal regions of *ncl*<sup>-/-</sup> mutants have reduced *sox10:egfp* expression suggesting  
204 that while NCC migration into the arches is unaffected, migration to other cranial regions may be  
205 altered. We further validated *sox10:gfp* transgene expression data by assessing endogenous  
206 Sox10 protein expression in *ncl*<sup>+/+</sup> and *ncl*<sup>-/-</sup> embryos. The number of Sox10+ cells in the  
207 pharyngeal region is similar between 36 hpf *ncl*<sup>+/+</sup> and *ncl*<sup>-/-</sup> mutant embryos (Fig. S4 D), confirming  
208 that NCC induction and migration into the pharyngeal arches occurs normally in *ncl*<sup>-/-</sup> mutants.  
209 We observed no alteration in the formation or segregation of the endodermal pouches in 36 hpf  
210 *ncl*<sup>-/-</sup> mutants as evidenced by a normal pattern of Zn-8 expression (Fig. S4 A). This implied that  
211 the osteochondrogenic anomalies in *ncl*<sup>-/-</sup> mutant embryos were not the result of abnormal  
212 pharyngeal pouch development.

213

## 214 **Chondrogenic and Osteogenic defects in *ncl*<sup>-/-</sup> mutants**

215 Given the chondrogenic defects observed in *ncl*<sup>-/-</sup> mutant embryos, we next tested for  
216 altered chondrogenic markers in *ncl*<sup>+/+</sup> and *ncl*<sup>-/-</sup> embryos. Sox9a is a transcriptional factor that  
217 promotes NCC differentiation into chondrocytes<sup>26</sup>. *sox9a* mRNA and its downstream target,

218 *col2a1a* are reduced in *ncl*<sup>-/-</sup> mutant embryos (Fig. 4A). The overall expression of Sox9a protein  
219 is also reduced in *ncl*<sup>-/-</sup> mutants, but significantly in pharyngeal arches 2-5, which differentiate into  
220 the ceratohyal and ceratobranchial cartilages (Fig. 4B). This provides a molecular explanation for  
221 the cartilage hypoplasia in *ncl*<sup>-/-</sup> mutant embryos.

222 To determine the basis for the osteogenic defects in *ncl*<sup>-/-</sup> mutant embryos, we assessed  
223 for altered osteogenic markers in *ncl*<sup>+/+</sup> and *ncl*<sup>-/-</sup> embryos. Runx2a and Runx2b are transcription  
224 factors that regulate NCC differentiation to bone<sup>27</sup>. *runx2a* is upregulated in the *ncl*<sup>-/-</sup> mutant  
225 embryos, as is *runx2b*, but *runx2b* upregulation is not statistically significant (Fig. 4C). We  
226 examined the expression of Runx2a and Runx2b in *ncl*<sup>-/-</sup> and *ncl*<sup>+/+</sup> embryos using a pan-Runx2  
227 antibody, which revealed that Runx2 protein is upregulated in craniofacial regions especially in  
228 the MHB and pharyngeal arches (Fig. 4D). Runx2 overexpression has been previously observed  
229 to result in premature osteoblast differentiation<sup>28</sup>, which leads to a reduced pool of osteoblasts. In  
230 agreement with this finding, the expression of Runx2a and Runx2b downstream targets, *col1a2*  
231 and *col10a1* are reduced in *ncl*<sup>-/-</sup> embryos compared to *ncl*<sup>+/+</sup> embryos. Furthermore, we observe  
232 an increase in early osteoblast markers, *spp1* (osteopontin) and *sp7* and a concomitant decrease  
233 in late osteoblast marker, *bglap* (osteocalcin) in 36 hpf *ncl*<sup>-/-</sup> mutant embryos. To confirm the  
234 presence of prematurely differentiated osteoblasts, we stained *ncl*<sup>+/+</sup> and *ncl*<sup>-/-</sup> mutant embryos for  
235 alkaline phosphatase activity, which is endogenously high in primary osteoblasts<sup>29</sup>. At 3 dpf (Fig.  
236 4F) and 5 dpf (Fig. S5), alkaline phosphatase staining is significantly diminished in the lower jaw  
237 of *ncl*<sup>-/-</sup> embryos compared to *ncl*<sup>+/+</sup> embryos. Interestingly, in the neurocranium, osteoblasts in the  
238 cranial sutures at both 3 dpf and 5 dpf stain for alkaline phosphatase, which reveals the shape of  
239 the sutures in *ncl*<sup>-/-</sup> mutant embryos is altered, consistent with the effects of Runx2 mutations in  
240 humans<sup>30,31</sup>.

241

242

243

## 244 **Fgf8a expression is reduced in *ncl*<sup>-/-</sup> mutant embryos**

245 In mice, Fgf8 signaling upregulates chondrogenic genes such as *Sox9* and *Col2a1* while  
246 inhibiting osteogenic genes including *Runx2*<sup>32,33</sup>. Similarly, Fgf signaling regulates *Sox9a* in  
247 zebrafish<sup>34</sup>. Interestingly, *fgf8a* mutant zebrafish have craniofacial defects comparable to *ncl*<sup>-/-</sup>  
248 embryos, especially in the cartilages of the viscerocranium<sup>35</sup>, suggesting a potential link between  
249 Nucleolin and Fgf signaling during chondrogenesis. Therefore, we examined the expression of  
250 Fgf8a in *ncl*<sup>+/+</sup> and *ncl*<sup>-/-</sup> embryos and observed a significant general downregulation of Fgf8a in  
251 *ncl*<sup>-/-</sup> mutant embryos (Fig. 5A). We examined the expression of *fgf8a* mRNA by qPCR at four  
252 stages between 18-36 hpf in *ncl*<sup>-/-</sup> mutant embryos and discovered that as the expression of *ncl*  
253 decreases in the mutants, the expression of *fgf8a* also declines (Fig. 5B). In silico analysis of *fgf8a*  
254 mRNA revealed that the *fgf8a* 5'UTR contains a Nucleolin consensus binding site – UCCCGA<sup>14</sup>,  
255 leading us to hypothesize that Nucleolin post-transcriptionally controls the expression of *fgf8a*.  
256 We tested for Nucleolin binding to *fgf8a* mRNA through RNA immunoprecipitation and observed  
257 that *fgf8a* mRNA is pulled down with Nucleolin while that of the housekeeping gene *actb* is not  
258 (Fig. 5C). This suggests that Nucleolin specifically binds to *fgf8a* mRNA and is required to  
259 maintain its stability.

260 To examine if the phenotype of *ncl*<sup>-/-</sup> mutant embryos is a direct consequence of Fgf8a  
261 downregulation, we treated *ncl*<sup>+/+</sup> and *ncl*<sup>-/-</sup> embryos at 18hpf with human recombinant FGF8,  
262 which has 76% identity to the zebrafish Fgf8a protein. Compared to untreated *ncl*<sup>-/-</sup> mutant  
263 embryos, we observe considerable rescue of the craniofacial cartilage phenotype, which  
264 progressively improves with higher concentrations of FGF8 treatment at 60 hpf (Fig. S6 A). The  
265 same is true for 5 dpf mutants, with restoration of ceratohyal polarity at 0.25 ug/ul FGF8 (Fig. 5D,  
266 E) and rescue of basihyal and ceratobranchial chondrogenesis at 1 ug/ul (Fig. 5D, F). In addition,  
267 the length of the trabecula and the parasphenoid is restored in FGF8 treated *ncl*<sup>-/-</sup> larvae.  
268 However, while osteogenesis of the tooth improves, the mutant embryos are still missing their 4V<sup>1</sup>  
269 teeth, indicating that FGF8 partially rescues the *ncl*<sup>-/-</sup> phenotype. At 8 dpf, the craniofacial

270 cartilages (Fig. S6 C) as well as the putative posterior swim bladder (Fig. S6 B) are rescued in  
271 FGF8 treated *ncl*<sup>-/-</sup> larvae. The FGF8 treated *ncl*<sup>-/-</sup> fry survive at least until 15 dpf, which is 5 days  
272 longer than untreated *ncl*<sup>-/-</sup> fry and all the craniofacial skeleton elements are rescued (Fig. S6 D-  
273 E). However, these fry are smaller than *ncl*<sup>+/+</sup> fry and their anterior swim bladders fail to inflate.  
274 Nonetheless, our data indicates that exogenous FGF8 is sufficient to rescue the craniofacial  
275 skeleton defects and increase the lifespan of *ncl*<sup>-/-</sup> mutants.

276

### 277 **FGF8 treatment restores rRNA synthesis in *ncl*<sup>-/-</sup> mutant embryos**

278 *Fgf8* is expressed in the endoderm-derived epithelium of the pharyngeal arches, while Fgf  
279 receptors are expressed in both pharyngeal endoderm as well as osteochondroprogenitors<sup>36-38</sup>.  
280 Therefore, Fgf8a could directly or indirectly regulate chondrogenic and osteogenic differentiation,  
281 suggesting that the FGF8 rescue of cranioskeletal defects of *ncl*<sup>-/-</sup> embryos could be a result of 1)  
282 Fgf signaling through FGF8 interaction with Fgf receptor on osteochondroprogenitors, 2) FGF8  
283 could rescue rRNA transcription, or 3) FGF8 could trigger mesenchymal cell-autonomous  
284 pathway such as Bmp signaling.

285 To test if addition of FGF8 rescues rRNA synthesis, we examined rRNA transcription in  
286 FGF8 treated *ncl*<sup>-/-</sup> embryos and observe an upregulation in 47S rRNA in FGF8 treated *ncl*<sup>-/-</sup>  
287 embryos (Fig. 6A). This could result either by FGF8 directly interacting with rDNA or through  
288 Fgfr2, which has been shown to positively regulate rRNA transcription<sup>39</sup>. Consistent with rescued  
289 levels of rRNA, the FGF8 treated *ncl*<sup>-/-</sup> embryos also have fewer TUNEL positive cells compared  
290 to *ncl*<sup>+/+</sup> embryos (Fig. 6B), indicating that FGF mediated rRNA transcription is important for cell  
291 survival.

292 It is well known that Fgf and Bmp signaling interact synergistically during craniofacial  
293 development<sup>40</sup>. More specifically, Fgf8 and Bmp2, respectively regulate osteochondroprogenitor  
294 differentiation by positively regulating Sox9 expression<sup>41,42</sup>. Therefore, we examined the  
295 expression of *bmp2* in FGF8 untreated and treated *ncl*<sup>-/-</sup> embryos at 30 hpf. We observe that while

296 *bmp2* expression is downregulated in untreated *ncl*<sup>-/-</sup> embryos, its expression is increased in  
297 treated *ncl*<sup>+/+</sup> and *ncl*<sup>-/-</sup> embryos, suggesting that addition of FGF8 rescues cartilage and bone  
298 development by stimulating Bmp signaling in osteochondroprogenitors (Fig. 6C). Taken together,  
299 our data suggests that Nucleolin regulates craniofacial development through two different  
300 pathways, one by controlling ribosomal RNA transcription and the other by regulating FGF  
301 signaling.

302

### 303 **Discussion**

304 Nucleolin is the most abundant phosphoprotein in the nucleolus<sup>43</sup>, however its localization is not  
305 limited to the nucleolus. Nucleolin is also observed in the nucleus, cytoplasm and plasma  
306 membrane where depending on the cell type and the environmental condition, Nucleolin performs  
307 various functions ranging from DNA replication and repair<sup>44</sup>, chromatin remodeling<sup>18</sup>, rRNA  
308 transcription and processing<sup>13,20</sup>, mRNA turnover and translation<sup>22,45-51</sup> and viral entry and  
309 replication<sup>52-54</sup>. While the cellular and molecular function of Nucleolin has been previously studied  
310 *in vitro*, its role in vertebrate development remains to be explored. Here we show that Nucleolin  
311 is critical for zebrafish craniofacial development and specifically for proper differentiation of NCC  
312 into cartilage and bone.

313         Similar to other rRNA modifying proteins such as Nol11, Wrd43 and Fibrillarin whose  
314 absence results in chondrogenesis defects in zebrafish and frog<sup>6,11,12</sup>, it is interesting that  
315 perturbation of a global process such as ribosome biogenesis results in craniofacial defects. One  
316 possible reason for this tissue specificity could be that genes required for rRNA transcription such  
317 as subunits of RNA Pol I, *fb1* and *ncl* are highly expressed in NCC and craniofacial tissues, making  
318 them more susceptible to disruptions in rRNA transcription<sup>9-11,55</sup>. rRNA transcription is essential  
319 not only because it forms the catalytic core of ribosomes, but also because in its absence cells  
320 undergo proteotoxic stress as a result of ribosomal protein accumulation<sup>56,57</sup>. Free ribosomal

321 proteins bind to Mdm2 resulting in the accumulation of p53, and consequently cell cycle arrest  
322 and cell death<sup>21,58</sup> (Fig. 7A, B).

323         Contradicting previous *in vitro* studies in human cell lines<sup>59</sup>, we observe that Nucleolin  
324 does not bind to *p53* mRNA in zebrafish, most likely due to the differences in the 5' and 3' UTR  
325 sequences of human and zebrafish p53. However, Nucleolin and p53 proteins bind to each other  
326 suggesting that Nucleolin is required to stabilize p53 protein<sup>23</sup>. In the absence of Nucleolin, p53  
327 accumulates temporarily and apoptosis is initiated. However, the effect is not sustained and it  
328 does not result in lethality. This is consistent with an initial upregulation of *p21* mRNA expression  
329 from 18-24 hpf, followed by a steep decrease by 36 hpf, and is indicative of a momentary surge  
330 in the transcriptional activity of p53. p21 is a cell cycle inhibitor, which when significantly reduced  
331 releases cell cycle arrest<sup>60,61</sup>, resulting in higher proliferation in *ncl*<sup>-/-</sup> embryos compared to *ncl*<sup>+/+</sup>  
332 embryos. This increase in proliferation in the absence of Nucleolin is contrary to published  
333 literature, which suggests that Nucleolin promotes proliferation in various cell types<sup>62,63</sup>. This  
334 indicates that a different mechanism regulates proliferation in the absence of Nucleolin in  
335 mammalian cells and developing zebrafish. Over time, apoptosis decreases, and proliferation  
336 increases in *ncl*<sup>-/-</sup> embryos, which results in embryo survival until 5 dpf.

337         The chondrogenic hypoplasia observed in *ncl*<sup>-/-</sup> mutants can be linked to Sox9a  
338 downregulation, while the osteogenic defects arise due to the higher expression of Runx2. This  
339 leads to premature osteoblast differentiation, which reduces the pool of cells that can  
340 subsequently differentiate into osteoblasts. Thus, early osteoblast markers such as *spp1* and *sp7*  
341 are more highly expressed in *ncl*<sup>-/-</sup> embryos compared to *ncl*<sup>+/+</sup> siblings, while late osteoblast  
342 markers such as *bglap* are downregulated. However, both Sox9a and Runx2 are indirect targets  
343 of Nucleolin based on in silico analysis of their 5' and 3' UTRs, which do not contain a Nucleolin  
344 consensus binding site. *Fgf8a*, which is also downregulated in *ncl*<sup>-/-</sup> mutants and is required for  
345 osteochondroprogenitor differentiation, does contain a Nucleolin binding site in its 5' UTR. The 5'  
346 UTR of an mRNA is responsible for both stability and translation of mRNA<sup>64</sup>. Given that *fgf8a*

347 mRNA decreases over time together with reductions in Nucleolin, this suggests that Nucleolin is  
348 responsible for stabilizing *fgf8a* mRNA by binding to its 5' UTR. In addition, the maternal  
349 expression of Nucleolin in zebrafish until 18 hpf possibly prevents early embryonic phenotypes  
350 such as agenesis of the cerebellum and MHB organizer which have previously been associated  
351 with *Fgf8a* downregulation<sup>65</sup>. This is further corroborated by the restoration of osteogenesis and  
352 chondrogenesis in *ncl*<sup>-/-</sup> mutants with exogenous FGF8, suggesting that the critical time for *Fgf8a*  
353 function in *ncl*<sup>-/-</sup> zebrafish is around 18 hpf (Fig. 7C). FGF8 treatment increased the survival of *ncl*<sup>-/-</sup>  
354 larvae by 5 days, suggesting continued treatment may further augment lifespan and this will be  
355 tested in the future.

356 In mice *Fgf8* has been shown to preferentially bind to *Fgfr1*<sup>66</sup>. However, in zebrafish *Fgf*  
357 receptors are functionally redundant with respect to *Fgf8a* ligand binding<sup>67</sup>. Therefore, it is likely  
358 that *Fgf8a* could activate *Fgfr2*. *Fgfr2* is known to bind to the promoter of rDNA and result in  
359 histone modification, which activates rRNA transcription similar to Nucleolin<sup>39</sup>. This suggests that  
360 upon FGF8 treatment, either FGF8 or *Fgfr2* translocates to the nucleolus and changes the state  
361 of the rDNA chromatin from closed to open (Fig. 7C). However, given that the upstream core  
362 elements of rDNA that RNA Pol I and UBTF bind to are as yet unannotated in zebrafish, further  
363 work is required to test our hypothesis. This involves identifying the upstream core elements using  
364 a combination of ATAC-seq and ChIP-seq followed by elucidating the mechanism of *Fgf8* and  
365 *Fgfr2* regulation of rRNA transcription in the absence of Nucleolin.

366 *Fgf8* has been previously shown to regulate variance in facial shape in a dose dependent  
367 manner<sup>68</sup>. Furthermore, rDNA transcription is known to be essential for craniofacial  
368 development<sup>69,70</sup> and variation<sup>71</sup>. Therefore, as an upstream regulator of *Fgf8*, and with a role in  
369 rDNA transcription, by extrapolation, Nucleolin may also play an important role in determining  
370 facial shape. Overall, our work uncovered that Nucleolin regulates *Fgf8* signaling as well as rRNA  
371 transcription, making craniofacial development especially susceptible to Nucleolin loss-of-  
372 function.

## 373 **Materials and Methods**

### 374 **Zebrafish**

375 Adult zebrafish (*Danio rerio*) were housed and maintained in the Stowers Institute Zebrafish  
376 Facility according to an IACUC approved protocol (# 2021-124). Zebrafish embryos were raised  
377 at 28.5°C and staged using standard procedures<sup>72</sup>. To prevent pigment development for  
378 immunostaining experiments 0.002% 1-Phenyl-2- thiourea was added to the embryo media.  
379 *nc1*<sup>hi2078Tg</sup> zebrafish were obtained through ZIRC and maintained as heterozygotes on the AB/TU  
380 background and incrossed to generate homozygous mutant embryos. PCR was used to detect  
381 for the presence or absence of the insertional mutation. The *nc1* wild type allele was detected  
382 using the following primers: forward 5'- TTACATGTGGTGAGAAGGCC -3' and reverse 5'-  
383 AACACCTCCCCTGGGTTTAT -3'. The *nc1* mutant allele was detected using the following  
384 primers: forward 5'- TTACATGTGGTGAGAAGGCC -3' and reverse 5'-  
385 GCTAGCTTGCCAAACCTACAGGT -3'. The *nc1* heterozygous mutant lines were crossed with  
386 reporter line *Tg(7.2kb-sox10:gfp)*, referred to as *sox10:gfp*, as well as the *tp53*<sup>M214K</sup> line.

387

### 388 **Live imaging**

389 Embryos were anaesthetized with MS-222 and mounted in 2% methyl cellulose while submerged  
390 in E2 media. Embryos were imaged using a Leica MZ16 microscope equipped with a Nikon DS-  
391 Ri1 camera and NIS Elements BR 3.2 imaging software. When appropriate, manual Z stacks  
392 were taken and the images were assembled using Helicon Focus software.

393

### 394 **Skeletal stain**

395 Alcian blue and Alizarin red staining to label cartilage and bone, respectively, was performed  
396 according to Walker and Kimmel<sup>72</sup>. Embryos were cleared in glycerol and potassium hydroxide  
397 and dissected for neurocranium and viscerocranium images. Imaging was performed as  
398 described above.



399

#### 400 **Immunostaining, EdU and TUNEL**

401 Whole-mount immunostaining was performed according to standard protocols<sup>73</sup> using primary  
402 antibodies against Nucleolin (1:500, abcam #ab22758), GFP (1:500, Life Technologies #A6455),  
403 Zn-8 (1:250, DSHB), Sox10 (1:500, GeneTex # GTX128374), Sox9a (1:500, GeneTex #  
404 GTX128370), Runx2 (1:500, Abcam # ab23981), Fgf8a (1:500, GeneTex # GTX128126) and  
405 pHH3 (1:2000, Millipore # 06-570). Fluorescent secondary antibodies, either Alexa-488 or Alexa-  
406 546 (1:500, Invitrogen) were used for detection. TUNEL and EdU Click-IT assay were performed  
407 according to the manufacturer's instructions with slight modifications. Embryos were incubated  
408 for 1 hour on ice and 1 hour at 37°C in the reaction buffer. Embryos were imaged using a Zeiss  
409 upright 700 confocal microscope and images were captured and processed using Zen software.  
410 ImageJ software was used to quantify the fluorescence intensity and area. The Student's t-test  
411 was used to determine statistical significance.

412

#### 413 **Alkaline Phosphatase staining**

414 Fixed embryos were washed in Tris-Buffer Saline and NTMT buffer (100mM NaCl, 100mM Tris-  
415 HCl, pH9.5, 50mM MgCl<sub>2</sub>, 1% Tween20), followed by incubation with NBT (3.5µl) and BCIP (5µl)  
416 in NTMT for the desired color revelation time. The images were collected using a Nikon DS-Ri1  
417 camera.

418

#### 419 **Western blot**

420 Protein samples consisting of 5 fish/sample were collected at appropriate stages. Embryos were  
421 homogenized and suspended in sample buffer containing Tris pH 8.0, Sodium Chloride, SDS,  
422 Sodium deoxycholate, NP-40 and protease inhibitor and used for Western blotting according to  
423 standard protocols<sup>74</sup>. Protein quantity was estimated via a BCA assay. Primary antibodies used  
424 were  $\gamma$ -tubulin (1:1000, Sigma),  $\alpha$ -tubulin (1:10000, Sigma), p53 (1:500, Cell Signaling

425 Technology, #2524S) and Nucleolin (1:500, Abcam #ab22758). Western blots were imaged and  
426 quantified using a CLx-Scanner (Li-COR) and Odyssey Software. For quantification, band  
427 intensities for p53 were compared to housekeeping control  $\gamma$ -Tubulin. The Student's t-test was  
428 performed for statistical analysis.

429

### 430 **Immunoprecipitation**

431 Protein lysates from 28 hpf control and *ncl*<sup>-/-</sup> zebrafish were used (n = 25 per biological replicate;  
432 total three biological replicates) for pre-conjugation with Mdm2 antibody (Cell Signaling  
433 Technology, #86934) and IgG with magnetic beads. Because the embryos were group and lysed  
434 immediately after collection, genotyping by conventional methods could not be performed.  
435 Instead, the lysate was used in a western blot for Nucleolin to substitute as genotyping. Following  
436 immunoprecipitation, the samples were used in western blotting and immunoblotted for both  
437 Mdm2 and p53.

438

### 439 **qPCR**

440 RNA was collected from zebrafish embryos using the Qiagen miRNeasy Micro Kit and tested for  
441 quality on an Agilent 2100 Bioanalyzer. The Superscript III kit (Invitrogen) was used to synthesize  
442 cDNA for qPCR using random hexamer primers. The following primers were used: *ncl* forward 5'-  
443 ATATCGAGGGCAGGAGTATT-3' and reverse 5'- GTTTTCGTAGGTCCAGAGTT -3'; *tp53*  
444 forward 5'-CGAGCCACTGCCATCTATAAG-3' and reverse 5'-TGCCCTCCACTCTTATCAAATG-  
445 3', *p21* forward 5'- GACCAACATCACAGATTTCTAC-3' and reverse 5'-  
446 TGCAATAACGCTGCTACG-3', *sox9a* forward 5'-GGAGCTCAGCAAACTCTGG-3' and  
447 reverse 5'- AGTCGGGGTGATCTTTCTTG-3'; *col2a1* forward 5'- GCGACTTTCACCCCTTAGGA-  
448 3' and reverse 5'- TGCATACTGCTGGCCATCTT-3'; *runx2a* forward 5'-  
449 AACTTTCTGTGCTCGGTGCT-3' and reverse 5'-AACTTTCTGTGCTCGGTGCT-3'; *runx2b*  
450 forward 5'-CAAACACCCAGACCCTCACT-3' and reverse 5'-GTATGACCATGGTGGGGAAG-3';

451 col1a2 forward 5'-CTGGCATGAAGGGACACAG-3' and reverse 5'-  
452 GGGGTTCCATTTGATCCAG-3'; col10a1 forward 5'-CCTGTCTGGCTCATACCACA-3' and  
453 reverse 5'-AAGGCCACCAGGAGAAGAAG-3'; fgf8a forward 5'-GCCGTAGACTAATCCGGACC-  
454 3' and reverse 5'-TTGTTGGCCAGAACTTGCAC-3'; osteocalcin forward 5'-  
455 TGAGTGCTGCAGAATCTCCTAA-3' and reverse 5'- GTCAGGTCTCCAGGTGCAGT-3';  
456 osteopontin forward 5'-TGAAACAGATGAGAAGGAAGAGG-3' and reverse 5'-  
457 GGGTAGCCCAAACACTGTCTCC-3'; sp7 forward 5'- GGATACGCCGCTGGGTCTA-3' and reverse  
458 5'-TCCTGACAATTCGGGCAATC-3'; bmp2 forward 5'- TCCATCACGAAGAAGCCGTGG-3' and  
459 reverse 5'- TGAGAAACTCGTCACTGGGGA-3'; actb forward 5'-  
460 TTCCTTCCTGGGTATGGAATC-3' and reverse 5'- GCACTGTGTTGGCATAACAGG-3'; canx  
461 forward 5'- ACGATACCGCAGAGAATGGAGACA-3' and reverse 5'-  
462 TCCTGTTTCTGGGAGACCTCCTCA-3'. Previously published rRNA primer sequences were  
463 used for qPCR<sup>75</sup>. Power Sybr (Life Technologies) reaction mix and the ABI 7900HT real time PCR  
464 cyclor was used measure cDNA amplification. Three biological replicates were run in technical  
465 triplicate for each experiment. No template and no reverse-transcriptase samples were run as  
466 negative controls.

467

#### 468 **RNA immunoprecipitation**

469 Lysates from 28hpf wild-type zebrafish were used (n = 100 per biological replicate; total three  
470 biological replicates) for pre-conjugation with Nucleolin antibody (Abcam, # ab22758) and IgG  
471 with magnetic beads. Immunoprecipitation was performed using manufacturer's instructions for  
472 the EZ-Nuclear RIP Kit (EMD Millipore, #17-10 523), followed by cDNA synthesis and qRT-PCR  
473 for 5'ETS, ITS1, ITS2 and 18S rRNA, *fgf8a*, *p53* and *actb*.

474

#### 475 **FGF8 treatment**

476 *ncf*<sup>+/+</sup> and *ncf*<sup>-/-</sup> embryos were treated with 0.0625, 0.25 and 1 ng/ul human recombinant FGF8  
477 (Thermofisher scientific, # PHG0184) diluted in E2 media by immersion starting at 18hpf. The  
478 FGF8 in media was replaced every 24 hours until 5 dpf following which the larvae were added to  
479 the tank system and allowed to develop until 15 dpf.

480

#### 481 **Morpholino knockdown**

482 1-2 cell stage *ncf*<sup>+/+</sup> and *ncf*<sup>-/-</sup> embryos were injected with 5–10 ng of morpholino (MO) targeting  
483 the p53 AUG start site or a control MO (Gene Tools, LLC). The sequences of the MOs used were  
484 as follows: p53 MO 5'- GCGCCATTGCTTTGCAAGAATTG-3' and control MO 5'-  
485 CCTCTTACCTCAGTTACAATTTATA-3'. Following injection, embryos were raised at 28°C to 5  
486 dpf for skeletal staining.

487

#### 488 **Acknowledgements**

489 We are thankful to all members of the Trainor lab for their input and suggestions during the course  
490 of this work. We thank Dr. Tom Schilling for the gift of the *sox10:egfp* zebrafish, Dr. Tatjana  
491 Piotrowski for the gift of the tp53 zebrafish and the SIMR Aquatics staff, especially Carrie  
492 Carmichael for zebrafish care and maintenance. We also thank Mark Miller for illustrating Figure  
493 7 and Dr. Cathy McKinney for imaging support. This work was supported by the Stowers Institute  
494 for Medical Research (P.A.T) and a postdoctoral fellowship from American Association for  
495 Anatomy (S.D). Original data underlying this manuscript can be accessed from the Stowers  
496 Original Data Repository at <http://www.stowers.org/research/publications/libpb-1658>.

497

498 **References**

499

- 500 1. Laferté, A. *et al.* The transcriptional activity of RNA polymerase I is a key determinant for the  
501 level of all ribosome components. *Genes Dev.* **20**, 2030–2040 (2006).
- 502 2. Panov, K. I., Friedrich, J. K., Russell, J. & Zomerdijk, J. C. B. M. UBF activates RNA  
503 polymerase I transcription by stimulating promoter escape. *EMBO J.* **25**, 3310–3322 (2006).
- 504 3. Friedrich, J. K., Panov, K. I., Cabart, P., Russell, J. & Zomerdijk, J. C. B. M. TBP-TAF  
505 Complex SL1 Directs RNA Polymerase I Pre-initiation Complex Formation and Stabilizes  
506 Upstream Binding Factor at the rDNA Promoter. *J. Biol. Chem.* **280**,  
507 10.1074/jbc.M501595200 (2005).
- 508 4. Valdez, B. C., Henning, D., So, R. B., Dixon, J. & Dixon, M. J. *The Treacher Collins*  
509 *syndrome (TCOF1) gene product is involved in ribosomal DNA gene transcription by*  
510 *interacting with upstream binding factor.* [www.pnas.org/cgi/doi/10.1073/pnas.0402492101](http://www.pnas.org/cgi/doi/10.1073/pnas.0402492101)  
511 (2004).
- 512 5. Freed, E. F., Prieto, J.-L., McCann, K. L., McStay, B. & Baserga, S. J. NOL11, Implicated in  
513 the Pathogenesis of North American Indian Childhood Cirrhosis, Is Required for Pre-rRNA  
514 Transcription and Processing. *PLoS Genet.* **8**, e1002892 (2012).
- 515 6. Zhao, C. *et al.* Tissue Specific Roles for the Ribosome Biogenesis Factor Wdr43 in  
516 Zebrafish Development. *PLOS Genet.* **10**, e1004074 (2014).
- 517 7. Tollervey, D., Lehtonen, H., Carmo-Fonseca, M. & Hurt, E. C. The small nucleolar RNP  
518 protein NOP1 (fibrillarin) is required for pre-rRNA processing in yeast. *EMBO J.* **10**, 573–  
519 583 (1991).
- 520 8. Dixon, J. *et al.* Tcof1/Treacle is required for neural crest cell formation and proliferation  
521 deficiencies that cause craniofacial abnormalities. *Proc. Natl. Acad. Sci. U. S. A.* **103**,  
522 13403–13408 (2006).

- 523 9. Watt, K. E. N., Neben, C. L., Hall, S., Merrill, A. E. & Trainor, P. A. tp53-dependent and  
524 independent signaling underlies the pathogenesis and possible prevention of Acrofacial  
525 Dysostosis - Cincinnati type. *Hum. Mol. Genet.* (2018) doi:10.1093/hmg/ddy172.
- 526 10. Watt, K. E. N., Achilleos, A., Neben, C. L., Merrill, A. E. & Trainor, P. A. The Roles of RNA  
527 Polymerase I and III Subunits Polr1c and Polr1d in Craniofacial Development and in  
528 Zebrafish Models of Treacher Collins Syndrome. *PLOS Genet.* **12**, e1006187 (2016).
- 529 11. Bouffard, S. *et al.* Fibrillarin is essential for S-phase progression and neuronal differentiation  
530 in zebrafish dorsal midbrain and retina. *Dev. Biol.* **437**, 1–16 (2018).
- 531 12. Griffin, J. N., Sondalle, S. B., del Viso, F., Baserga, S. J. & Khokha, M. K. The Ribosome  
532 Biogenesis Factor Nol11 Is Required for Optimal rDNA Transcription and Craniofacial  
533 Development in *Xenopus*. *PLoS Genet.* **11**, e1005018 (2015).
- 534 13. Ginisty, H., Amalric, F. & Bouvet, P. Nucleolin functions in the first step of ribosomal RNA  
535 processing. *EMBO J.* **17**, 1476–1486 (1998).
- 536 14. Ghisolfi-Nieto, L., Joseph, G., Puvion-Dutilleul, F., Amalric, F. & Bouvet, P. Nucleolin is a  
537 Sequence-specific RNA-binding Protein: Characterization of Targets on Pre-ribosomal RNA.  
538 *J. Mol. Biol.* **260**, 34–53 (1996).
- 539 15. Pijuan-Sala, B. *et al.* A single-cell molecular map of mouse gastrulation and early  
540 organogenesis. *Nature* **566**, 490–495 (2019).
- 541 16. Amsterdam, A. *et al.* Identification of 315 genes essential for early zebrafish development.  
542 *Proc. Natl. Acad. Sci. U. S. A.* **101**, 12792–12797 (2004).
- 543 17. Cabbage, C. C. & Mabee, P. M. Development of the cranium and paired fins in the zebrafish  
544 *Danio rerio* (Ostariophysi, Cyprinidae). *J. Morphol.* **229**, 121–160 (1996).
- 545 18. Cong, R. *et al.* Interaction of nucleolin with ribosomal RNA genes and its role in RNA  
546 polymerase I transcription. *Nucleic Acids Res.* **40**, 9441–9454 (2012).
- 547 19. Shao, Z. *et al.* DNA-PKcs has KU-dependent function in rRNA processing and  
548 haematopoiesis. *Nature* **579**, 291–296 (2020).

- 549 20. Roger, B., Moisand, A., Amalric, F. & Bouvet, P. Nucleolin provides a link between RNA  
550 polymerase I transcription and pre-ribosome assembly. *Chromosoma* **111**, 399–407 (2003).
- 551 21. Donati, G. *et al.* The balance between rRNA and ribosomal protein synthesis up- and  
552 downregulates the tumour suppressor p53 in mammalian cells. *Oncogene* **30**, 3274–3288  
553 (2011).
- 554 22. Takagi, M., Absalon, M. J., McLure, K. G. & Kastan, M. B. Regulation of p53 translation and  
555 induction after DNA damage by ribosomal protein L26 and nucleolin. *Cell* **123**, 49–63  
556 (2005).
- 557 23. Saxena, A., Rorie, C. J., Dimitrova, D., Daniely, Y. & Borowiec, J. A. Nucleolin inhibits Hdm2  
558 by multiple pathways leading to p53 stabilization. *Oncogene* **25**, 7274–7288 (2006).
- 559 24. Warga, R. M. & Nüsslein-Volhard, C. Origin and development of the zebrafish endoderm.  
560 *Dev. Camb. Engl.* **126**, 827–838 (1999).
- 561 25. Trevarrow, B., Marks, D. L. & Kimmel, C. B. Organization of hindbrain segments in the  
562 zebrafish embryo. *Neuron* **4**, 669–679 (1990).
- 563 26. Yan, Y.-L. *et al.* A zebrafish sox9 gene required for cartilage morphogenesis. *Dev. Camb.*  
564 *Engl.* **129**, 5065–5079 (2002).
- 565 27. Flores, M. V., Lam, E. Y. N., Crosier, P. & Crosier, K. A hierarchy of Runx transcription  
566 factors modulate the onset of chondrogenesis in craniofacial endochondral bones in  
567 zebrafish. *Dev. Dyn.* **235**, 3166–3176 (2006).
- 568 28. Liu, W. *et al.* Overexpression of Cbfa1 in osteoblasts inhibits osteoblast maturation and  
569 causes osteopenia with multiple fractures. *J. Cell Biol.* **155**, 157–166 (2001).
- 570 29. Ohlebusch, B. *et al.* Investigation of alpl expression and Tnap-activity in zebrafish implies  
571 conserved functions during skeletal and neuronal development. *Sci. Rep.* **10**, 13321 (2020).
- 572 30. Truong, T., Zhang, X., Pathmanathan, D., Soo, C. & Ting, K. Craniosynostosis-associated  
573 gene nell-1 is regulated by runx2. *J. Bone Miner. Res. Off. J. Am. Soc. Bone Miner. Res.* **22**,  
574 7–18 (2007).

- 575 31. Cuellar, A. *et al.* Gain-of-function variants and overexpression of RUNX2 in patients with  
576 nonsyndromic midline craniosynostosis. *Bone* **137**, 115395 (2020).
- 577 32. Xu, J. *et al.* FGF8 Signaling Alters the Osteogenic Cell Fate in the Hard Palate. *J. Dent.*  
578 *Res.* **97**, 589–596 (2018).
- 579 33. Zehentner, B. K., Dony, C. & Burtscher, H. The Transcription Factor Sox9 Is Involved in  
580 BMP-2 Signaling. *J. Bone Miner. Res.* **14**, 1734–1741 (1999).
- 581 34. Esain, V., Postlethwait, J. H., Charnay, P. & Ghislain, J. FGF-receptor signalling controls  
582 neural cell diversity in the zebrafish hindbrain by regulating olig2 and sox9. *Dev. Camb.*  
583 *Engl.* **137**, 33–42 (2010).
- 584 35. Crump, J. G., Maves, L., Lawson, N. D., Weinstein, B. M. & Kimmel, C. B. An essential role  
585 for Fgfs in endodermal pouch formation influences later craniofacial skeletal patterning.  
586 *Development* **131**, 5703–5716 (2004).
- 587 36. Walshe, J. & Mason, I. Fgf signalling is required for formation of cartilage in the head. *Dev.*  
588 *Biol.* **264**, 522–536 (2003).
- 589 37. Hall, C., Flores, M. V., Murison, G., Crosier, K. & Crosier, P. An essential role for zebrafish  
590 Fgfr1 during gill cartilage development. *Mech. Dev.* **123**, 925–940 (2006).
- 591 38. Larbuisson, A., Dalcq, J., Martial, J. A. & Muller, M. Fgf receptors Fgfr1a and Fgfr2 control  
592 the function of pharyngeal endoderm in late cranial cartilage development. *Differentiation*  
593 **86**, 192–206 (2013).
- 594 39. Neben, C. L., Tuzon, C. T., Mao, X., Lay, F. D. & Merrill, A. E. FGFR2 mutations in bent  
595 bone dysplasia syndrome activate nucleolar stress and perturb cell fate determination. *Hum.*  
596 *Mol. Genet.* **26**, 3253–3270 (2017).
- 597 40. Lovely, C. B., Swartz, M. E., McCarthy, N., Norrie, J. L. & Eberhart, J. K. Bmp signaling  
598 mediates endoderm pouch morphogenesis by regulating Fgf signaling in zebrafish. *Dev.*  
599 *Camb. Engl.* **143**, 2000–2011 (2016).



- 600 41. Chen, Y., Wang, Z., Chen, Y. & Zhang, Y. Conditional deletion of Bmp2 in cranial neural  
601 crest cells recapitulates Pierre Robin sequence in mice. *Cell Tissue Res.* **376**, 199–210  
602 (2019).
- 603 42. Shao, M. *et al.* FGF8 signaling sustains progenitor status and multipotency of cranial neural  
604 crest-derived mesenchymal cells in vivo and in vitro. *J. Mol. Cell Biol.* **7**, 441–454 (2015).
- 605 43. Tajrishi, M. M., Tuteja, R. & Tuteja, N. Nucleolin: The most abundant multifunctional  
606 phosphoprotein of nucleolus. *Commun. Integr. Biol.* **4**, 267–275 (2011).
- 607 44. Kobayashi, J. *et al.* Nucleolin Participates in DNA Double-Strand Break-Induced Damage  
608 Response through MDC1-Dependent Pathway. *PLOS ONE* **7**, e49245 (2012).
- 609 45. Abdelmohsen, K. *et al.* Enhanced translation by Nucleolin via G-rich elements in coding and  
610 non-coding regions of target mRNAs. *Nucleic Acids Res.* **39**, 8513–8530 (2011).
- 611 46. Zaidi, S. H. & Malter, J. S. Nucleolin and heterogeneous nuclear ribonucleoprotein C  
612 proteins specifically interact with the 3'-untranslated region of amyloid protein precursor  
613 mRNA. *J. Biol. Chem.* **270**, 17292–17298 (1995).
- 614 47. Zhang, B. *et al.* Nucleolin/C23 is a negative regulator of hydrogen peroxide-induced  
615 apoptosis in HUVECs. *Cell Stress Chaperones* **15**, 249–257 (2010).
- 616 48. Chen, C.-Y. *et al.* Nucleolin and YB-1 are required for JNK-mediated interleukin-2 mRNA  
617 stabilization during T-cell activation. *Genes Dev.* **14**, 1236–1248 (2000).
- 618 49. Zhang, Y. *et al.* Nucleolin links to arsenic-induced stabilization of GADD45 $\alpha$  mRNA. *Nucleic*  
619 *Acids Res.* **34**, 485–495 (2006).
- 620 50. Jiang, Y., Xu, X.-S. & Russell, J. E. A Nucleolin-Binding 3' Untranslated Region Element  
621 Stabilizes  $\beta$ -Globin mRNA In Vivo. *Mol. Cell. Biol.* **26**, 2419–2429 (2006).
- 622 51. Föhling, M. *et al.* Role of nucleolin in posttranscriptional control of MMP-9 expression.  
623 *Biochim. Biophys. Acta* **1731**, 32–40 (2005).
- 624 52. Izumi, R. E., Valdez, B., Banerjee, R., Srivastava, M. & Dasgupta, A. Nucleolin stimulates  
625 viral internal ribosome entry site-mediated translation. *Virus Res.* **76**, 17–29 (2001).

- 626 53. Bose, S., Basu, M. & Banerjee, A. K. Role of nucleolin in human parainfluenza virus type 3  
627 infection of human lung epithelial cells. *J. Virol.* **78**, 8146–8158 (2004).
- 628 54. Nisole, S. *et al.* The anti-HIV pentameric pseudopeptide HB-19 binds the C-terminal end of  
629 nucleolin and prevents anchorage of virus particles in the plasma membrane of target cells.  
630 *J. Biol. Chem.* **277**, 20877–20886 (2002).
- 631 55. Weaver, K. N. *et al.* Acrofacial Dysostosis, Cincinnati Type, a Mandibulofacial Dysostosis  
632 Syndrome with Limb Anomalies, Is Caused by POLR1A Dysfunction. *Am. J. Hum. Genet.*  
633 **96**, 765–774 (2015).
- 634 56. Albert, B. *et al.* A ribosome assembly stress response regulates transcription to maintain  
635 proteome homeostasis. *eLife* **8**, e45002 (2019).
- 636 57. Tye, B. W. *et al.* Proteotoxicity from aberrant ribosome biogenesis compromises cell fitness.  
637 *eLife* **8**, e43002.
- 638 58. Scala, F. *et al.* Direct relationship between the level of p53 stabilization induced by rRNA  
639 synthesis-inhibiting drugs and the cell ribosome biogenesis rate. *Oncogene* **35**, 977–989  
640 (2016).
- 641 59. Chen, J., Guo, K. & Kastan, M. B. Interactions of Nucleolin and Ribosomal Protein L26  
642 (RPL26) in Translational Control of Human p53 mRNA. *J. Biol. Chem.* **287**, 16467–16476  
643 (2012).
- 644 60. Gartel, A. L. & Radhakrishnan, S. K. Lost in transcription: p21 repression, mechanisms, and  
645 consequences. *Cancer Res.* **65**, 3980–3985 (2005).
- 646 61. Hemmati, P. G. *et al.* Loss of p21 disrupts p14ARF-induced G1 cell cycle arrest but  
647 augments p14ARF-induced apoptosis in human carcinoma cells. *Oncogene* **24**, 4114–4128  
648 (2005).
- 649 62. Ugrinova, I. *et al.* Inactivation of nucleolin leads to nucleolar disruption, cell cycle arrest and  
650 defects in centrosome duplication. *BMC Mol. Biol.* **8**, 66 (2007).

- 651 63. Jiang, B. *et al.* Nucleolin enhances the proliferation and migration of heat-denatured human  
652 dermal fibroblasts. *Wound Repair Regen. Off. Publ. Wound Heal. Soc. Eur. Tissue Repair*  
653 *Soc.* **23**, 807–818 (2015).
- 654 64. Dash, S., Siddam, A. D., Barnum, C. E., Janga, S. C. & Lachke, S. A. RNA Binding Proteins  
655 in Eye Development and Disease: Implication of Conserved RNA Granule Components.  
656 *Wiley Interdiscip. Rev. RNA* **7**, 527–557 (2016).
- 657 65. Reifers, F. *et al.* Fgf8 is mutated in zebrafish acerebellar (ace) mutants and is required for  
658 maintenance of midbrain-hindbrain boundary development and somitogenesis. *Dev. Camb.*  
659 *Engl.* **125**, 2381–2395 (1998).
- 660 66. Mott, N. N., Chung, W. C. J., Tsai, P.-S. & Pak, T. R. Differential Fibroblast Growth Factor 8  
661 (FGF8)-Mediated Autoregulation of Its Cognate Receptors, Fgfr1 and Fgfr3, in Neuronal  
662 Cell Lines. *PLOS ONE* **5**, e10143 (2010).
- 663 67. Leerberg, D. M., Hopton, R. E. & Draper, B. W. Fibroblast Growth Factor Receptors  
664 Function Redundantly During Zebrafish Embryonic Development. *Genetics* **212**, 1301–1319  
665 (2019).
- 666 68. Green, R. M. *et al.* Developmental nonlinearity drives phenotypic robustness. *Nat. Commun.*  
667 **8**, 1970 (2017).
- 668 69. Trainor, P. A. & Merrill, A. E. Ribosome biogenesis in skeletal development and the  
669 pathogenesis of skeletal disorders. *Biochim. Biophys. Acta - Mol. Basis Dis.* **1842**, 769–778  
670 (2014).
- 671 70. Terrazas, K., Dixon, J., Trainor, P. A. & Dixon, M. J. Rare syndromes of the head and face:  
672 mandibulofacial and acrofacial dysostoses. *Wiley Interdiscip. Rev. Dev. Biol.* **6**, (2017).
- 673 71. Claes, P. *et al.* Genome-wide mapping of global-to-local genetic effects on human facial  
674 shape. *Nat. Genet.* **50**, 414–423 (2018).

- 675 72. Kimmel, C. B., Ballard, W. W., Kimmel, S. R., Ullmann, B. & Schilling, T. F. Stages of  
676 embryonic development of the zebrafish. *Dev. Dyn. Off. Publ. Am. Assoc. Anat.* **203**, 253–  
677 310 (1995).
- 678 73. Westerfield, M. *The zebrafish book. A guide for the laboratory use of zebrafish (Danio rerio)*.  
679 (Univ. of Oregon Press, 2000).
- 680 74. Dash, S., Bhatt, S., Falcon, K. T., Sandell, L. L. & Trainor, P. A. Med23 Regulates Sox9  
681 Expression during Craniofacial Development. *J. Dent. Res.* 22034520969109 (2020)  
682 doi:10.1177/0022034520969109.
- 683 75. Azuma, M., Toyama, R., Laver, E. & Dawid, I. B. Perturbation of rRNA Synthesis in the  
684 bap28 Mutation Leads to Apoptosis Mediated by p53 in the Zebrafish Central Nervous  
685 System\*. *J. Biol. Chem.* **281**, 13309–13316 (2006).
- 686
- 687
- 688
- 689
- 690

## Figures and Figure Legends

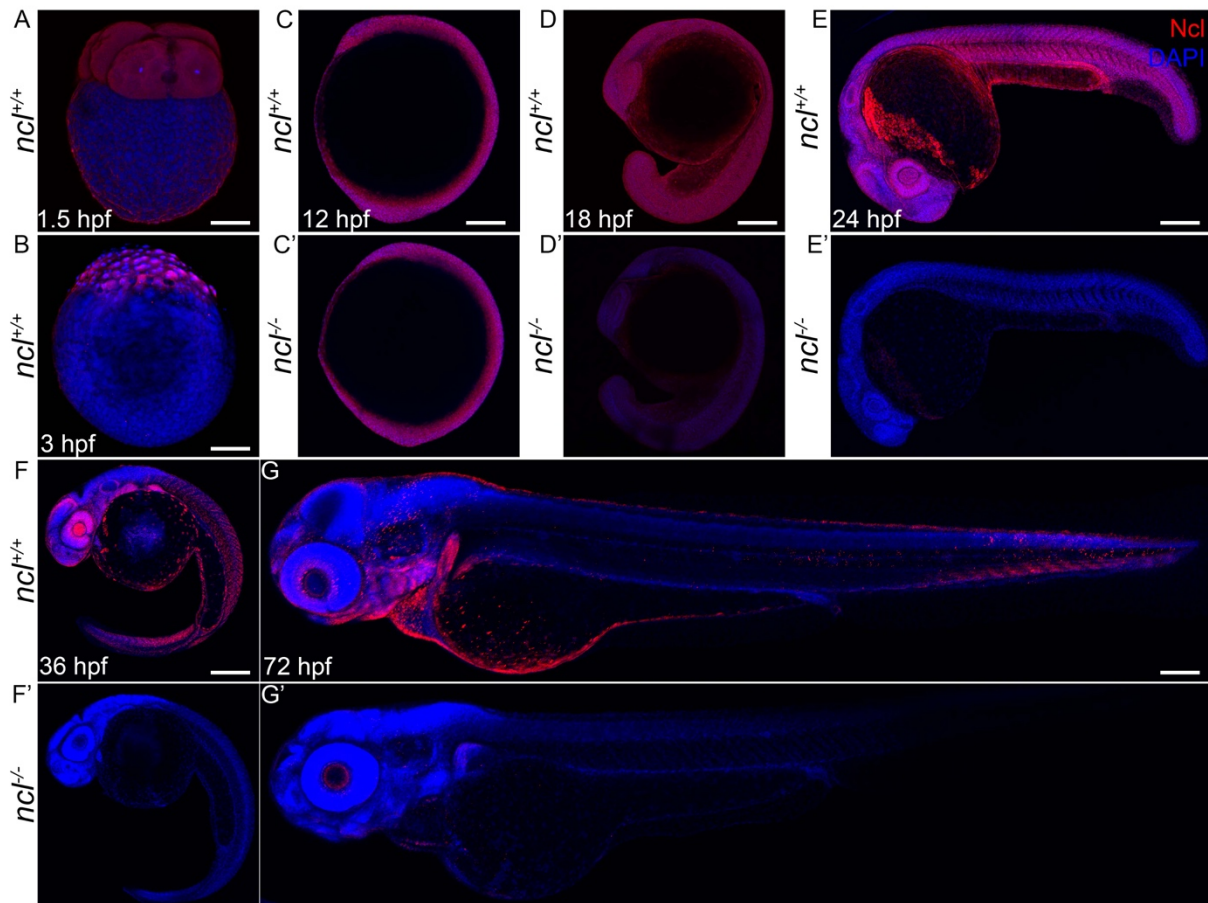

Figure 1. **Ncl expression during zebrafish development.** (A) During embryogenesis, Nucleolin is ubiquitously expressed in the cytoplasm of 4 cell stage wildtype embryo at 1.5hpf. (B) Similarly, 3hpf embryos also have ubiquitous cytoplasmic expression of Nucleolin. (C-C') At 12hpf, *ncl*<sup>+/+</sup> and *ncl*<sup>-/-</sup> embryos exhibit similar Nucleolin expression in the nucleus and cytoplasm in most cells of the embryos. (D-D') By 18hpf, the expression of Nucleolin in *ncl*<sup>+/+</sup> embryos is confined to the nucleus and is ubiquitous. In the *ncl*<sup>-/-</sup> embryos, the expression pattern of Nucleolin is similar to that of wildtype, however, the expression level is significantly lower than that of the wildtype. (E-E') By 24 hpf, the expression of Nucleolin is still ubiquitous with higher levels in the eye and the midbrain-hindbrain boundary in *ncl*<sup>+/+</sup> embryos, while it is absent in *ncl*<sup>-/-</sup> embryos. (F) At 36 hpf, the expression of Nucleolin becomes specific to the craniofacial region in the pharyngeal arches

as well as the eye. (G) In 3 dpf wildtype zebrafish, Nucleolin expression is specific to the jaw of the embryo. (F'-G') In the *nc1<sup>-/-</sup>* mutants, there is no expression of Nucleolin. Scale bar denotes 35  $\mu\text{m}$  for A-B, 70  $\mu\text{m}$  for C-C', 140  $\mu\text{m}$  for D-D', 250  $\mu\text{m}$  for E-E' and 300  $\mu\text{m}$  for F-G'.

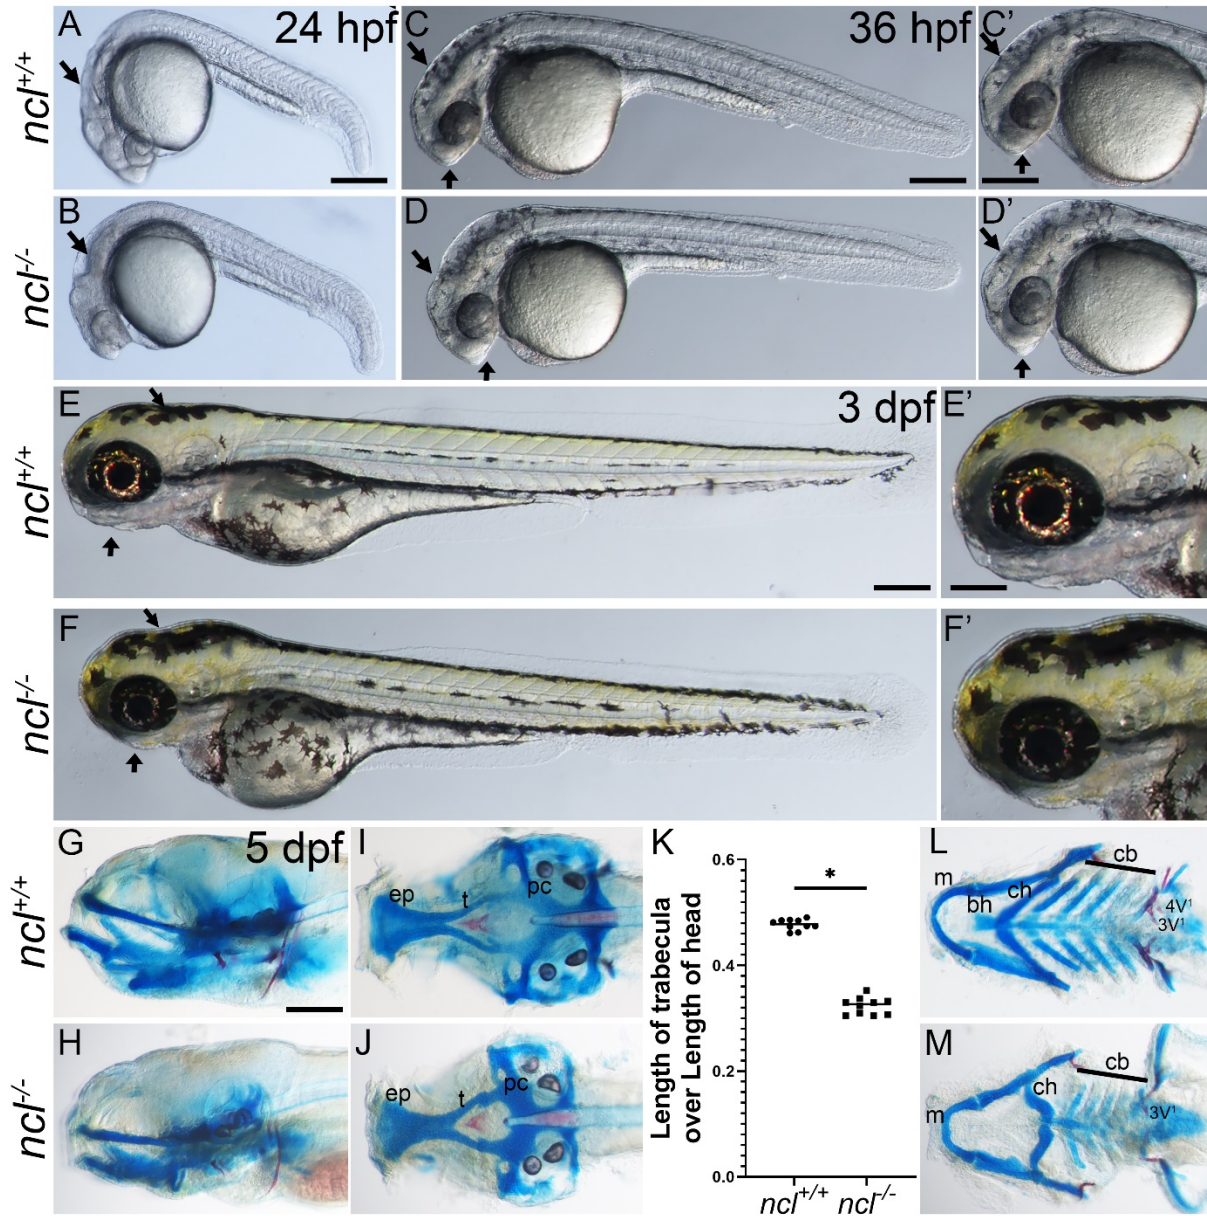

Figure 2. ***ncl*<sup>-/-</sup> mutants exhibit craniofacial defects.** (A-B) Compared to 24 hpf *ncl*<sup>+/+</sup> clutch mates, *ncl*<sup>-/-</sup> mutants have necrotic tissue (indicated by black arrows) in the craniofacial region. (C-D) By 36 hpf, the frontonasal prominence of *ncl*<sup>-/-</sup> mutants has a beak like appearance and the midbrain-hindbrain boundary is misshapen compared to *ncl*<sup>+/+</sup> siblings (indicated by black arrows). The craniofacial region is magnified in C'-D'. (E-F) At 3 dpf, the *ncl*<sup>-/-</sup> mutants have smaller jaws and a misshapen head (indicated by black arrows). The craniofacial region is magnified in E'-F'. (G-H) Skeletal preparations of 5 dpf wildtypes and *ncl*<sup>-/-</sup> mutants reveal defects in the cartilages

of the jaw. (I-J) In the neurocranium, the chondrocytes in the ethmoid plate (ep) are delayed in development, and the trabeculae are smaller and wider compared to the wildtype zebrafish at the same stage. (K) Quantification of the length of trabecula/ presphenoid in *ncf<sup>+/+</sup>* and *ncf<sup>-/-</sup>* embryos as a ratio of the length of the head measured from anterior most point of ethmoid plate to the posterior most point of parachordal (pc). (L-M) In the viscerocranium, Meckel's cartilage is bent, the basihyal is missing, the polarity of the ceratohyal is inverted and the ceratobranchials are hypoplastic. In addition, the mutants have hypoplastic teeth and the 4V<sup>1</sup> teeth are missing. Abbr. ep: ethmoid plate, t: trabecula, pc: parachordal, m: meckel's, bh: basihyal, ch: ceratohyal, cb: ceratobranchial. Scale bars denotes 200  $\mu\text{m}$  for A-F, 50  $\mu\text{m}$  for C'-F', 70  $\mu\text{m}$  for G-J, L-M.



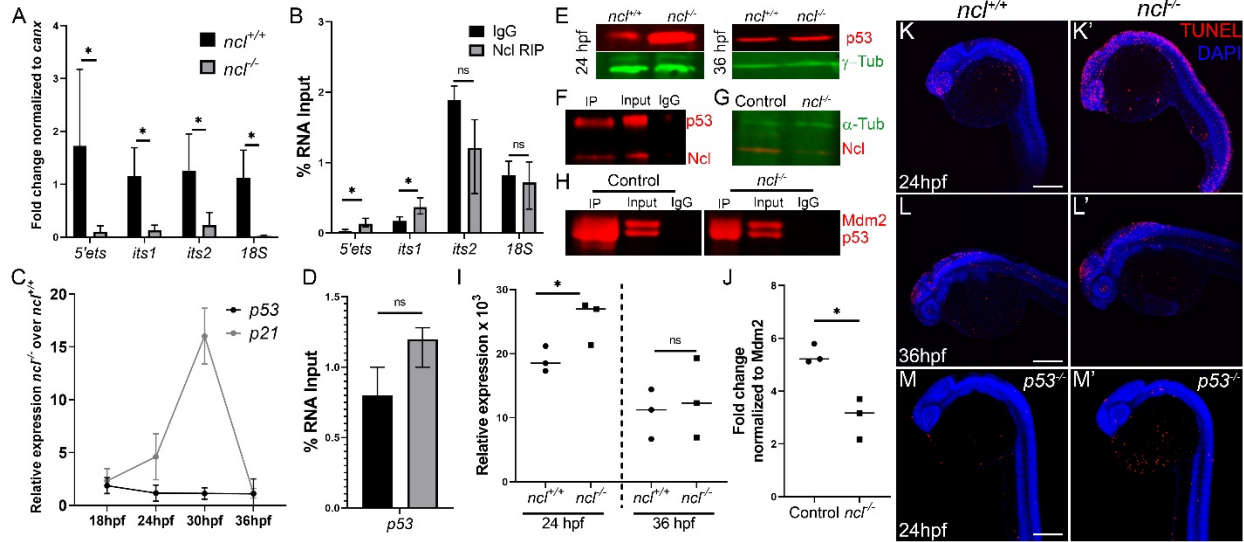

**Figure 3. Nucleolin is required for rRNA transcription and p53 regulation.** (A) qPCR for 5'ETS, ITS1, ITS2 and 18S segment of the pre-rRNA in *ncl*<sup>+/+</sup> and *ncl*<sup>-/-</sup> zebrafish indicates that rRNA transcripts are significantly lower in *ncl*<sup>-/-</sup> embryos compared to *ncl*<sup>+/+</sup> siblings. *canx* was used as an internal control. (B) RNA immunoprecipitation using a Nucleolin specific antibody indicates that Nucleolin binds to the 5'ETS and ITS1 region of the 47S rRNA but not to the ITS2 or 18S in wildtype zebrafish. (C) *p53* transcript expression is not significantly altered in *ncl*<sup>-/-</sup> mutant zebrafish between 18-36 hpf, however, its downstream target *p21* is significantly higher between 24-30 hpf in the *ncl*<sup>-/-</sup> mutants compared to wildtype zebrafish. (D) Nucleolin and IgG binding to *p53* mRNA is similar in wildtype zebrafish as observed by RNA immunoprecipitation. (D) *p53* protein levels are higher in *ncl*<sup>-/-</sup> mutants at 24hpf compared to *ncl*<sup>+/+</sup> sibling and comparable between *ncl*<sup>+/+</sup> and *ncl*<sup>-/-</sup> embryos at 36 hpf as observed by western blotting.  $\gamma$ -tubulin was used as a loading control. (F) Immunoprecipitation with a Nucleolin specific antibody followed by western blotting for *p53* and Nucleolin indicates that *p53* and Nucleolin bind to each other in wildtype zebrafish. (G) In *ncl*<sup>-/-</sup> mutants, Nucleolin expression is significantly reduced compared to controls.  $\alpha$ -tubulin was used as a control. (H) At 28hpf, control zebrafish have higher binding of Mdm2 and *p53* compared to mutant zebrafish. (I) Quantification of *p53* protein levels in 24 hpf and 36 hpf *ncl*<sup>+/+</sup> and *ncl*<sup>-/-</sup> embryos. (J) Quantification of *p53*-Mdm2 binding in *ncl*<sup>+/+</sup> and *ncl*<sup>-/-</sup>

embryos (K-K') *ncl*<sup>-/-</sup> mutants have more TUNEL positive cells at 24 hpf compared to *ncl*<sup>+/+</sup> siblings. (L-L') By 36 hpf, apoptosis is confined to the midbrain-hindbrain boundary in both *ncl*<sup>+/+</sup> and *ncl*<sup>-/-</sup> embryos. (M-M') On a *p53*<sup>-/-</sup> mutant background, the number of TUNEL positive cells in both *ncl*<sup>+/+</sup> and *ncl*<sup>-/-</sup> embryos at 24hpf is reduced. Scale bar denotes 70 μm for K-M'.

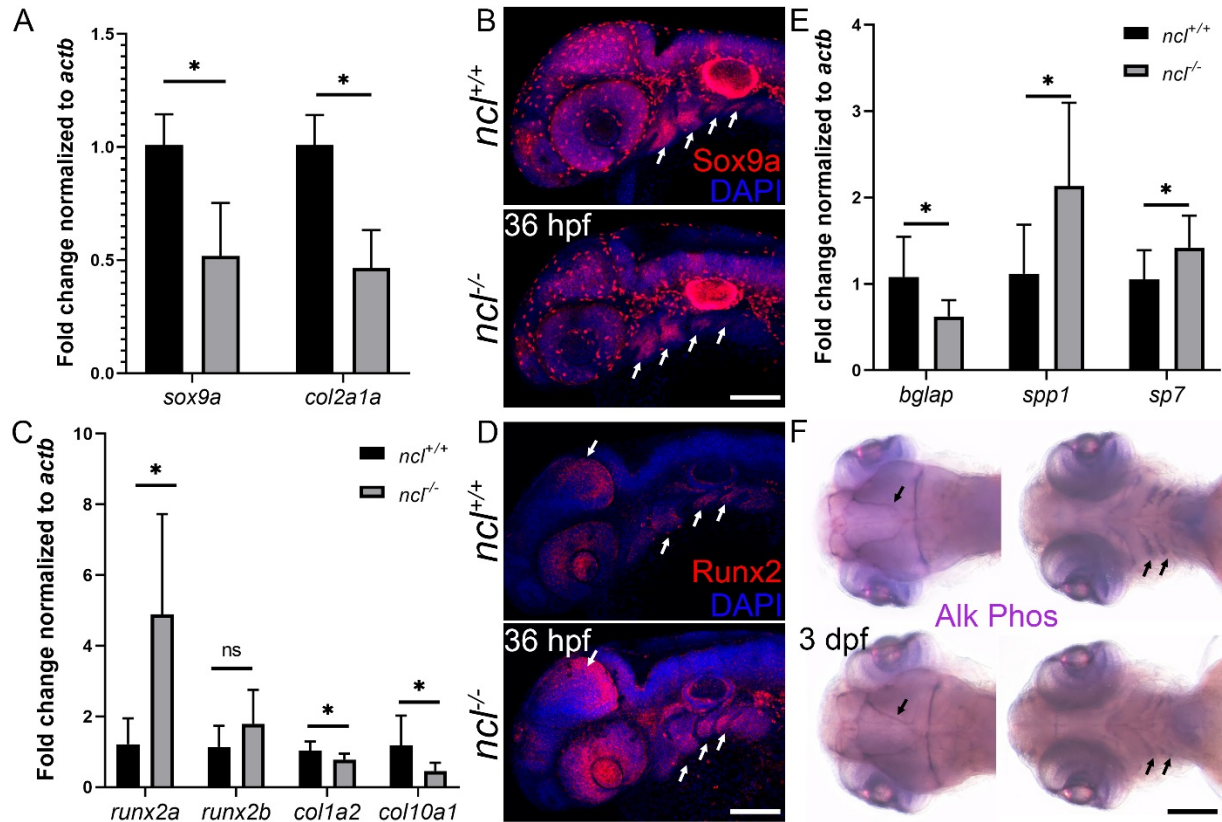

Figure 4. **Chondrogenesis and osteogenesis defects in *ncl*<sup>-/-</sup> embryos.** (A) qPCR revealed a significant downregulation of *sox9a* and *col2a1a* chondrogenesis markers in 36 hpf *ncl*<sup>-/-</sup> embryos compared to *ncl*<sup>+/+</sup> embryos. *actb* was used as housekeeping control. (B) Sox9a protein expression is significantly reduced in branchial arches 2-5 (white arrows) in *ncl*<sup>-/-</sup> embryos at 36 hpf. (C) qPCR of osteogenesis markers in 36 hpf *ncl*<sup>+/+</sup> and *ncl*<sup>-/-</sup> embryos indicates significant upregulation in *runx2a* transcript and downregulation in both *col1a2* and *col10a1* in *ncl*<sup>-/-</sup> embryos. (D) Runx2 protein expression is significantly increased in the midbrain-hindbrain boundary and branchial arches 2-5 (white arrows) in *ncl*<sup>-/-</sup> embryos at 36 hpf. (E) qPCR indicates a significant upregulation of early osteoblast markers, *bglap* and *spp1*, and downregulation of the late osteoblast marker *sp7* in 36 hpf *ncl*<sup>-/-</sup> embryos compared to controls (F) Alkaline phosphatase staining of 3 dpf *ncl*<sup>+/+</sup> and *ncl*<sup>-/-</sup> embryos reveals the distorted shape of the cranial sutures (dorsal

view) and reduced staining in the lower jaw (ventral view, black arrows) in ventral view (indicated by black arrows). Scale bar denotes 100  $\mu\text{m}$  for B, D and F.

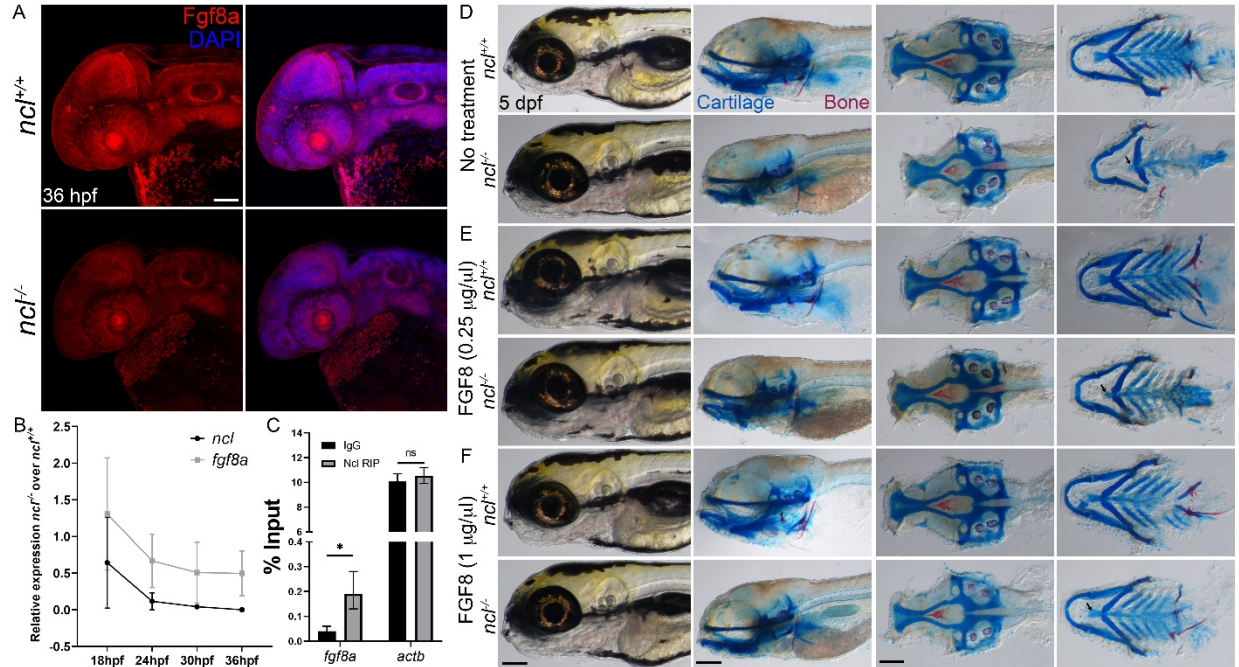

**Figure 5. Nucleolin regulates Fgf8a expression.** (A) Immunostaining of 36 hpf *ncl*<sup>+/+</sup> and *ncl*<sup>-/-</sup> embryos with an Fgf8a specific antibody reveals reduced expression of Fgf8a in *ncl*<sup>-/-</sup> embryos. (B) qPCR using tissues from *ncl*<sup>+/+</sup> and *ncl*<sup>-/-</sup> embryos at 18, 24, 30 and 36 hpf indicates *ncl* and *fgf8a* expression gradually reduce over time. (C) RNA immunoprecipitation followed by qPCR indicates higher binding of *fgf8a* to Nucleolin compared to IgG control. *actb* was used as negative control. (D) Skeletal preparations of 5 dpf *ncl*<sup>+/+</sup> and *ncl*<sup>-/-</sup> larvae as controls for 0.25 μg/μl, (E) and 1 μg/μl (F) FGF8 exogenous treatment. Exogenous FGF8 rescues the cranioskeletal phenotype of *ncl*<sup>-/-</sup> larvae. Scale bar denotes 100 μm for A and 70 μm for D, E, and F.

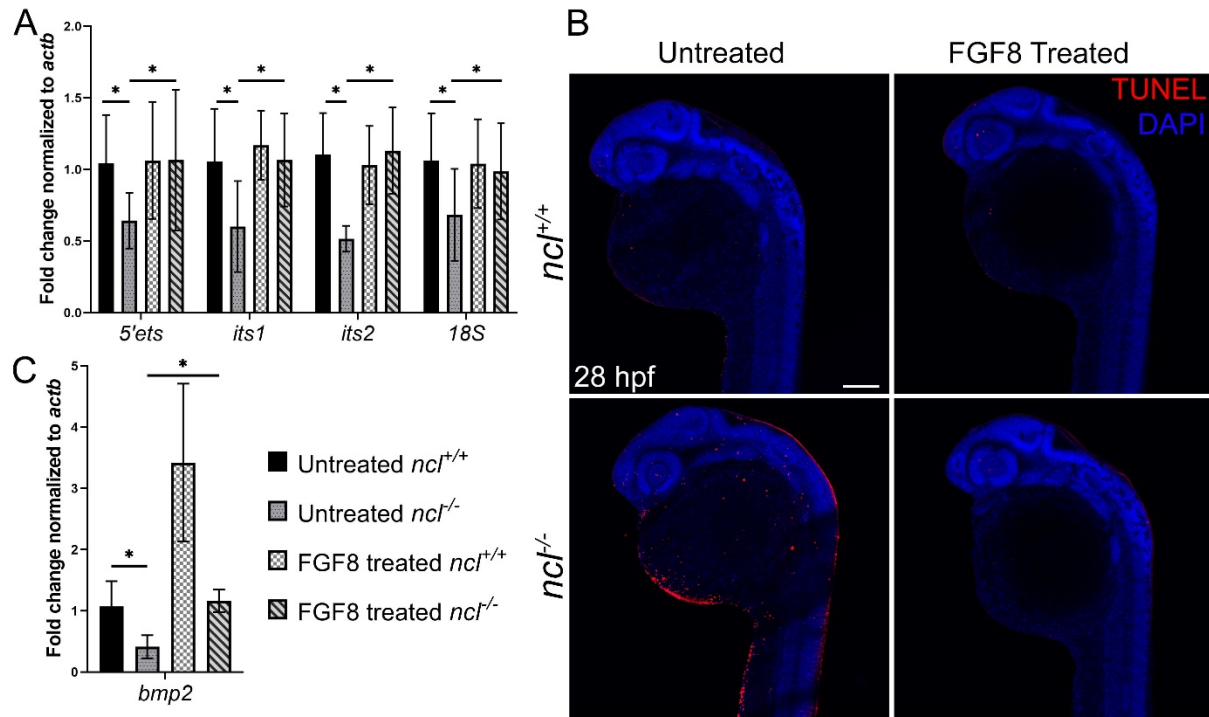

**Figure 6. FGF8 rescues rRNA transcription in *ncl*<sup>-/-</sup> embryos.** (A) qPCR for *5'ets*, *its1*, *its2* and *18S* in untreated and FGF8 treated *ncl*<sup>+/+</sup> and *ncl*<sup>-/-</sup> zebrafish indicates rescue of pre-RNA transcription in FGF8 treated *ncl*<sup>-/-</sup> zebrafish at 36 hpf. (B) TUNEL staining of untreated and FGF8 treated *ncl*<sup>+/+</sup> and *ncl*<sup>-/-</sup> zebrafish at 28 hpf indicates reduced TUNEL positive cells in FGF8 treated *ncl*<sup>-/-</sup> embryos compared to untreated *ncl*<sup>-/-</sup> embryos. (C) qPCR for *bmp2* in 36 hpf *ncl*<sup>+/+</sup> and *ncl*<sup>-/-</sup> embryos untreated and treated with 1  $\mu\text{g}/\mu\text{l}$  FGF8 indicates significant downregulation in *bmp2* in untreated *ncl*<sup>-/-</sup> embryos and significant upregulation in FGF8 treated *ncl*<sup>+/+</sup> embryos. In FGF8 treated *ncl*<sup>-/-</sup> embryos, the *bmp2* transcript level is rescued and comparable to untreated *ncl*<sup>+/+</sup> embryos. *actb* was used as housekeeping control. Scale bar denotes 70  $\mu\text{m}$  for B.

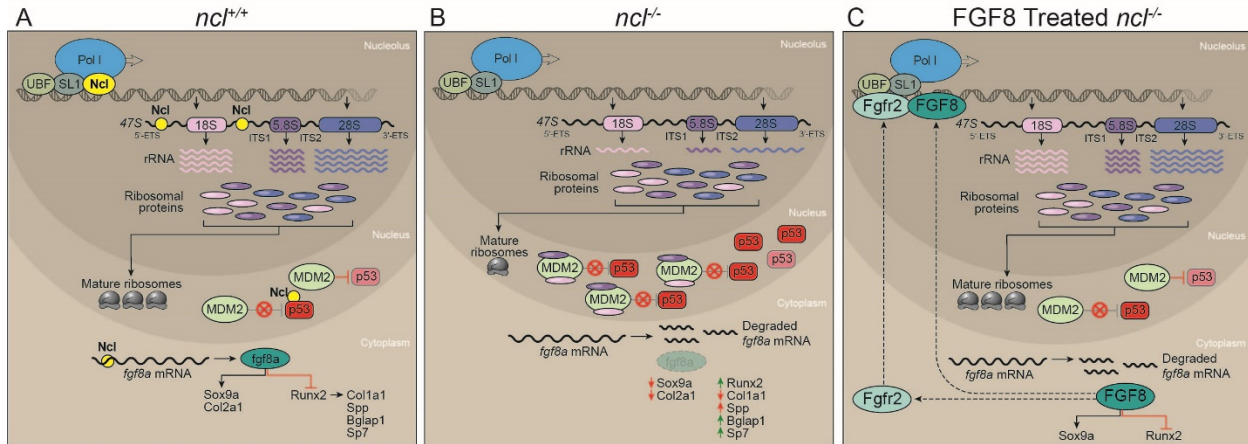

**Figure 7. Nucleolin regulates rRNA transcription and *fgf8a* mRNA stability.** (A) In wildtype zebrafish embryos, Nucleolin is required for rRNA transcription as well as processing. The rRNA transcripts are assembled together with ribosomal proteins to make ribosomes. Meanwhile Mdm2 binds to and ubiquitinates p53, which results in p53 proteasomal degradation. Nucleolin binds to and stabilizes p53 protein, thereby acting antagonistically to Mdm2. Furthermore, Nucleolin binds to and stabilizes *fgf8a*, which results in Fgf8a regulated chondrogenesis and osteogenesis, leading to proper craniofacial development. (B) In *ncl*<sup>-/-</sup> embryos, the absence of Nucleolin results in reduced rRNA transcription and possibly, a free pool of ribosomal proteins that bind to Mdm2. This limits Mdm2 binding to p53, resulting in a temporary increase in p53. However, due to the lack of Nucleolin in the cell, p53 protein and *fgf8a* mRNA have reduced half-lives. This results in misregulated chondrogenesis and osteogenesis leading to cranioskeletal defects. (C) In FGF8 treated *ncl*<sup>-/-</sup> embryos, exogenous FGF8 rescues cranioskeletal defects most likely by regulating chondrogenesis and osteogenesis as well recovering rRNA transcription either directly by FGF8 or indirectly by Fgfr2 binding to rDNA.

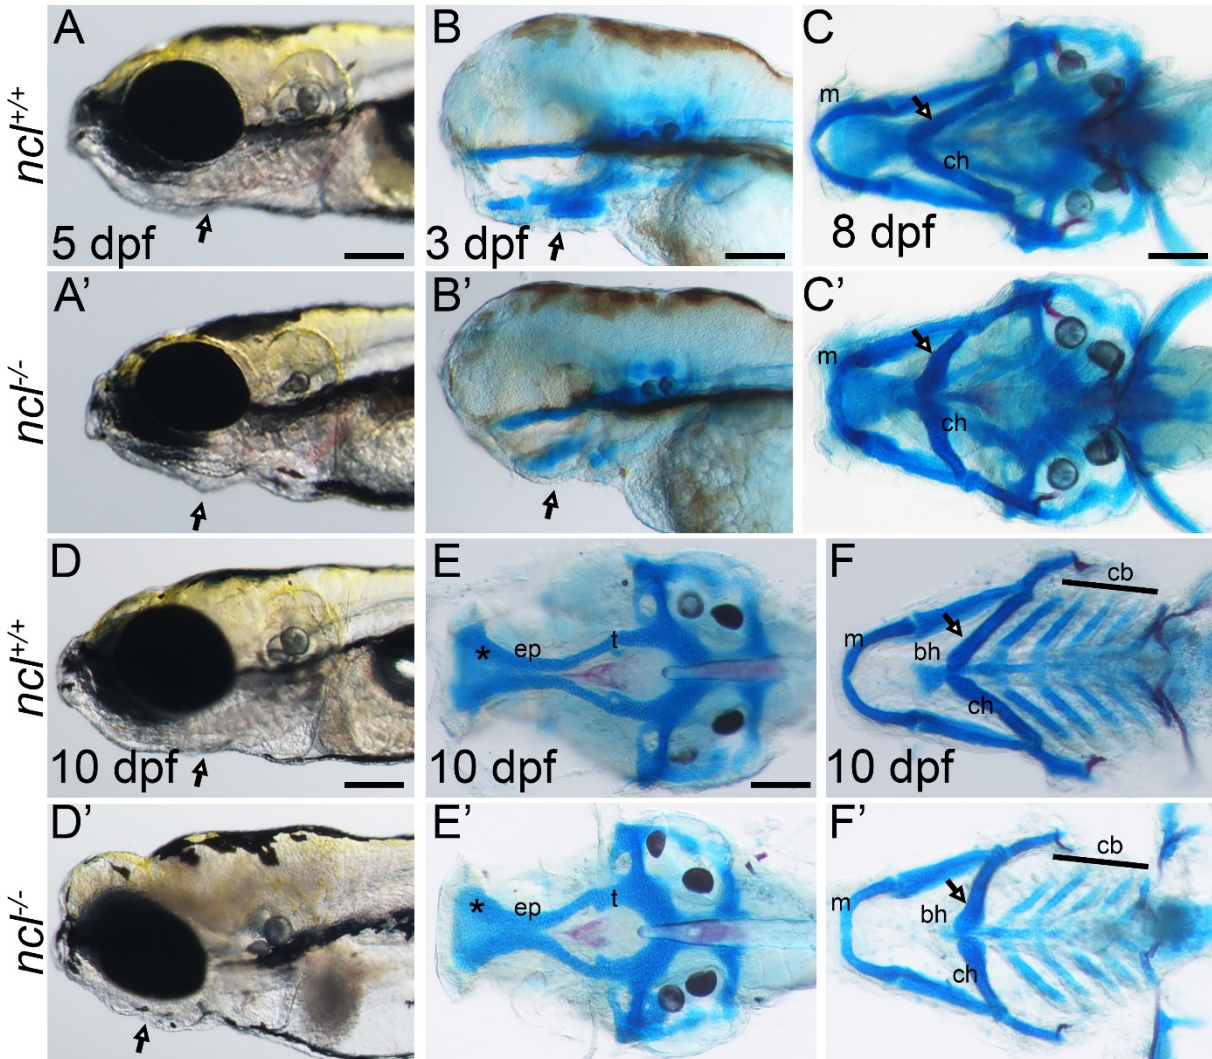

Figure S1. *ncl*<sup>-/-</sup> mutants exhibit craniofacial defects and embryonic lethality. (A-A') Brightfield imaging of 5 dpf *ncl*<sup>+/+</sup> and *ncl*<sup>-/-</sup> reveals the lower jaw is smaller in *ncl*<sup>-/-</sup> larvae (black arrow). Skeletal staining of 3 dpf (B-B') and 8 dpf (C-C') *ncl*<sup>+/+</sup> and *ncl*<sup>-/-</sup> larvae shows the ceratohyal is hypoplastic in 3 dpf mutants (B') and misshapen in 8 dpf mutants (C'). (D-D') Brightfield imaging of 10 dpf *ncl*<sup>+/+</sup> and *ncl*<sup>-/-</sup> larvae indicates the lower jaw is smaller in *ncl*<sup>-/-</sup> larvae (black arrow) and reveals necrotic tissue in the craniofacial region and the heart. Skeletal staining with Alcian blue shows differential labeling of the ethmoid plate (asterisk), with smaller trabecula in the neurocranium in 10 dpf *ncl*<sup>-/-</sup> larvae compared to controls (E-E'). Furthermore, in the viscerocranium, Meckel's cartilage is bent, the basihyal and ceratobranchials are hypoplastic and



the angle of the ceratohyal is obtuse (F-F'). Abbr. ep: ethmoid plate, t: trabecula, m: meckel's, bh: basihyal, ch: ceratohyal, cb: ceratobranchial. Scale bars denotes 350  $\mu\text{m}$  for A-A', 50  $\mu\text{m}$  for B-B', 100  $\mu\text{m}$  for C-F'.

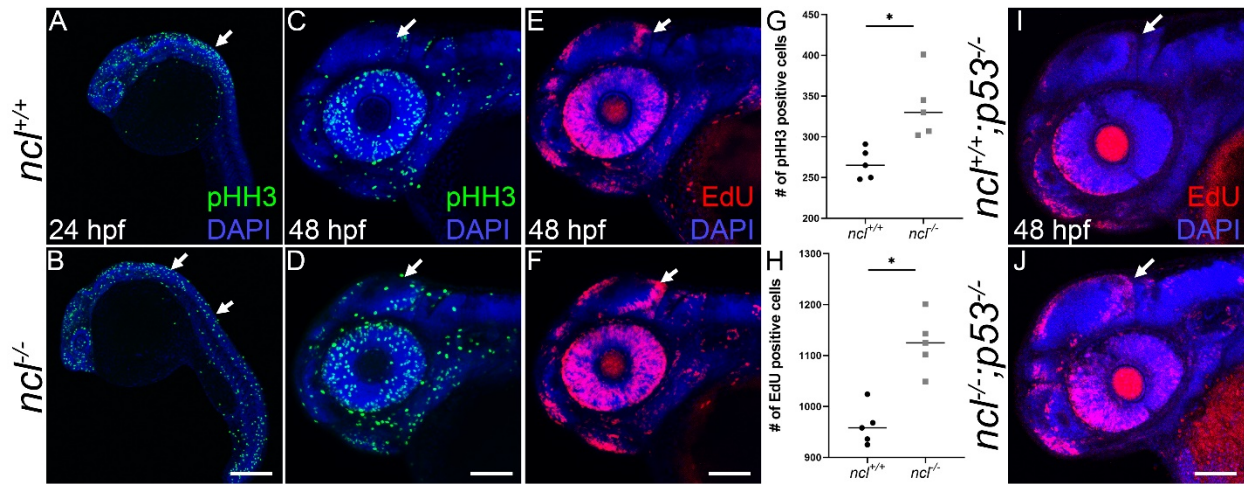

Figure S2. **Proliferation is increased in *ncl*<sup>-/-</sup> embryos.** At 24 hpf, proliferating cells were labeled with the mitotic marker, pHH3, which revealed no significant difference between *ncl*<sup>+/+</sup> (A) and *ncl*<sup>-/-</sup> (B) embryos. By 48 hpf, the number of proliferating cells labeled with pHH3 (C-D) and EdU (E-F) is significantly higher in the *ncl*<sup>-/-</sup> embryos compared to *ncl*<sup>+/+</sup> embryos, especially in the midbrain-hindbrain boundary. Quantification of pHH3 (G) and EdU (H) positive cells in the *ncl*<sup>+/+</sup> and *ncl*<sup>-/-</sup> embryos. Similarly, *ncl*<sup>-/-</sup>;p53<sup>-/-</sup> embryos (J) have more proliferating cells than *ncl*<sup>+/+</sup> embryos (I). Scale bar denotes 70  $\mu$ m for A-F, I-J.

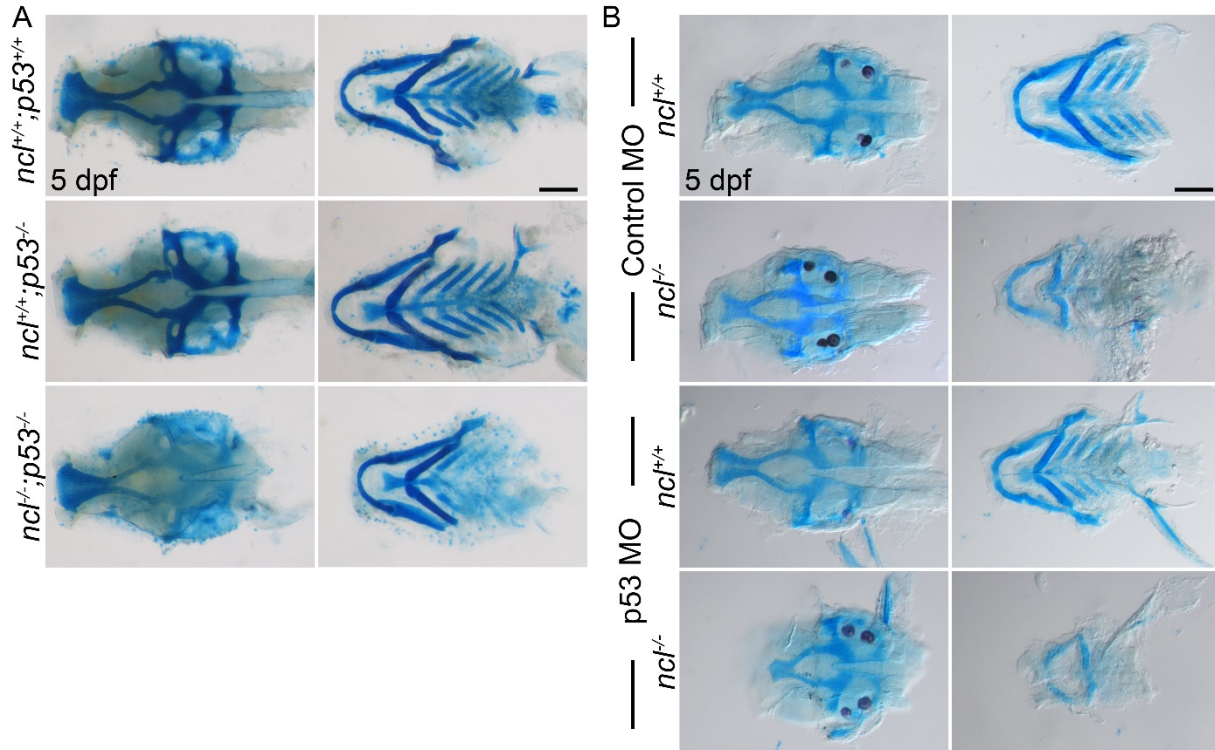

Figure S3. **p53 downregulation does not rescue the cranioskeletal anomalies in  $ncl^{-/-}$  mutants.** (A) Compared to  $ncl^{+/+};p53^{+/+}$  and  $ncl^{+/+};p53^{-/-}$  larvae at 5 dpf,  $ncl^{-/-};p53^{-/-}$  have hypoplastic neurocranium and ceratohyal cartilages. (B) Microinjecting p53 morpholinos into one cell stage  $ncl^{+/+}$  and  $ncl^{-/-}$  embryos reduces the size of the neurocranium and ethmoid plate as well as chondrogenesis of the ceratobranchials in  $ncl^{-/-}$  larvae compared to control morpholino injected  $ncl^{-/-}$  larvae. Abbr. MO: morpholino. Scale bar denotes 70  $\mu\text{m}$  for A-B.

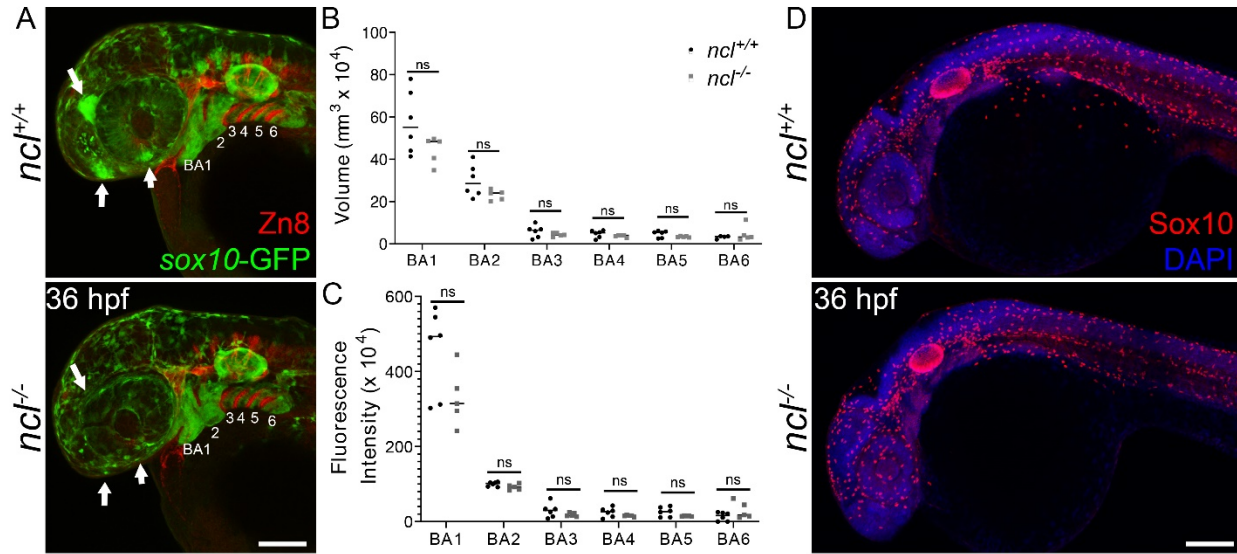

Fig S4. **Neural crest cell induction and migration is unaffected in *ncl*<sup>-/-</sup> mutant embryos.** (A) *ncl*<sup>+/+</sup> and *ncl*<sup>-/-</sup> embryos at 36 hpf were immunostained with YFP to reveal NCC labeled by the *sox10-egfp* transgene, and for the pharyngeal pouch marker, Zn8 to demarcate each pharyngeal arch. Volumetric (B) and fluorescence intensity (C) analysis of the pharyngeal arches indicates that the arches in *ncl*<sup>+/+</sup> and *ncl*<sup>-/-</sup> embryos are of comparable volume and have similar amounts of NCC. (D) Sox10 immunostaining reveals similar numbers of Sox10 positive cells in *ncl*<sup>+/+</sup> and *ncl*<sup>-/-</sup> embryos. Scale bar denotes 100  $\mu$ m for A and D.

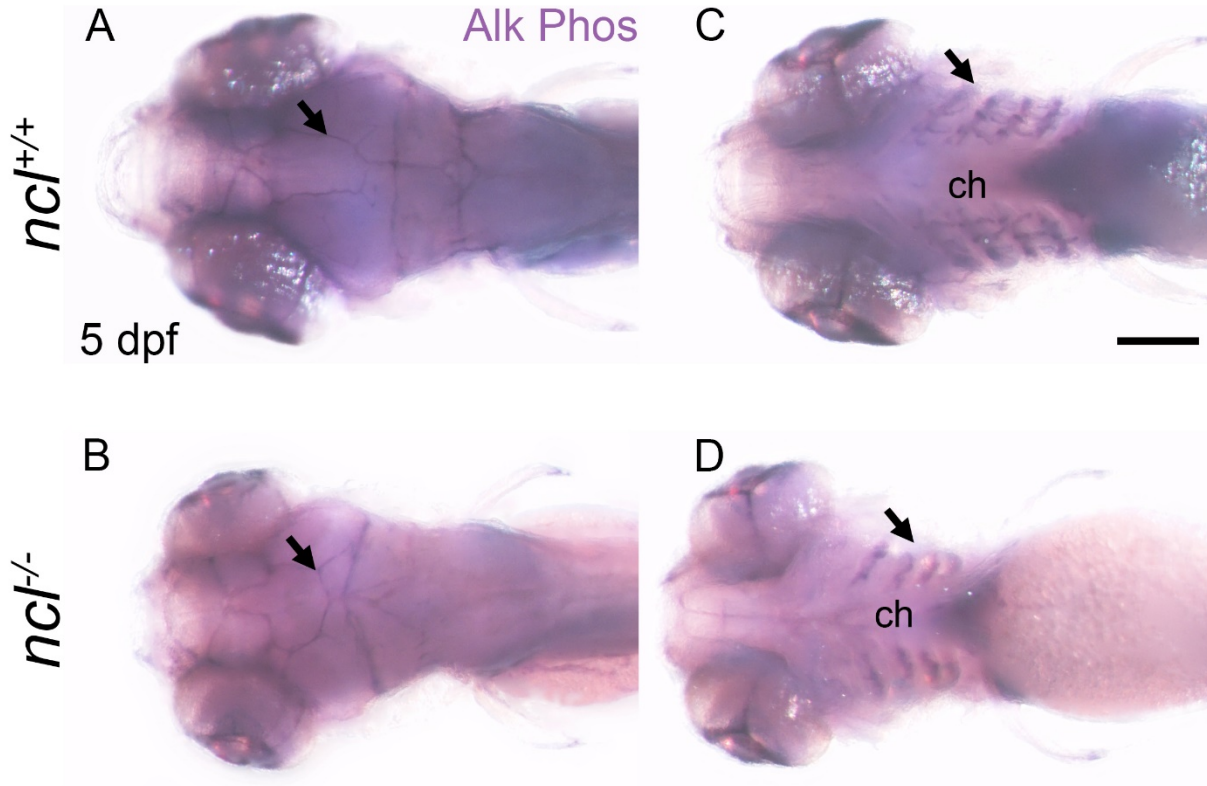

Fig. S5. **Osteoblast population is reduced in *ncl*<sup>-/-</sup> embryos.** Alkaline phosphatase staining reveals that compared to 5 dpf *ncl*<sup>+/+</sup> embryos (A), the sutures are misshapen in 5 *ncl*<sup>-/-</sup> embryos (B). Similarly, in ventral view, compared to *ncl*<sup>+/+</sup> embryos (C), the intensity of alkaline phosphatase staining is significantly reduced in the pharyngeal arches in *ncl*<sup>-/-</sup> embryos (D). Scale bar denotes 140  $\mu$ m for A and D.

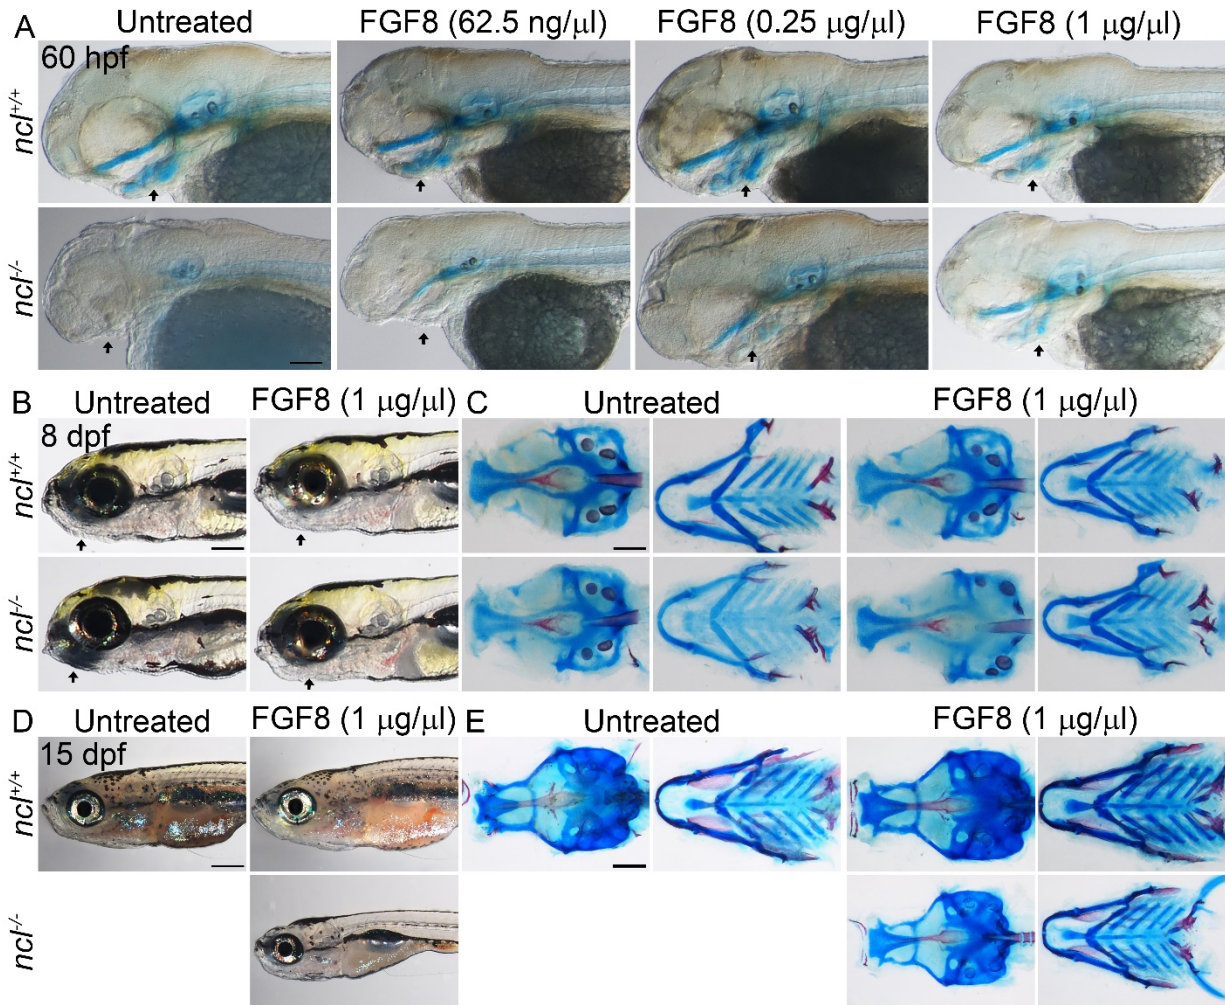

**Fig S6. FGF8 treatment rescues *ncl*<sup>-/-</sup> embryos.** (A) Alcian blue and Alizarin red staining of *ncl*<sup>+/+</sup> and *ncl*<sup>-/-</sup> embryos treated with FGF8 indicates that with increasing dose of FGF8, the cartilage elements of 60hpf *ncl*<sup>-/-</sup> embryos are progressively rescued. (B) Brightfield images of 8 dpf *ncl*<sup>+/+</sup> and *ncl*<sup>-/-</sup> larvae show that with FGF8 treatment, the craniofacial and swim bladder phenotypes are rescued. (C) Skeletal staining of 8 dpf untreated and treated *ncl*<sup>+/+</sup> and *ncl*<sup>-/-</sup> larvae indicates that most of the cranioskeletal defects including the hypoplastic basihyal and cetatobranchial are rescued with 1 μg/μl FGF8 treatment. (D) Brightfield images of 15 dpf *ncl*<sup>+/+</sup> and *ncl*<sup>-/-</sup> larvae show that with FGF8 treatment the larvae are smaller compared to untreated and treated *ncl*<sup>+/+</sup> larvae. In addition, the anterior swim bladder is not inflated in the treated *ncl*<sup>-/-</sup> larvae. The untreated *ncl*<sup>-/-</sup> larvae do not survive beyond 10 dpf. (E) Skeletal staining of 15 dpf untreated and treated *ncl*<sup>+/+</sup>

and *ncf*<sup>-/-</sup> larvae indicates that most of the cranioskeletal defects are comparable between treated *ncf*<sup>+/+</sup> and *ncf*<sup>-/-</sup> larvae, although the embryo is smaller. Scale bar denotes 50 μm for A, 250 μm for B, 100 μm for C, 350 μm for D and 200 μm for E.
